# Supplementary material for: Information needs among women taking part in primary HPV screening in England: a content analysis
Source: PubMed Central journal article supplement (PMC7745520; doi:10.1136/bmjopen-2020-044630), 2020-12-15
Supplement: bmjopen-2020-044630.draft_revisions.pdf [file bmjopen-2020-044630.draft_revisions.pdf]

# BMJ Open

BMJ Open is committed to open peer review. As part of this commitment we make the peer review history of every article we publish publicly available.

When an article is published we post the peer reviewers' comments and the authors' responses online. We also post the versions of the paper that were used during peer review. These are the versions that the peer review comments apply to.

The versions of the paper that follow are the versions that were submitted during the peer review process. They are not the versions of record or the final published versions. They should not be cited or distributed as the published version of this manuscript.

BMJ Open is an open access journal and the full, final, typeset and author-corrected version of record of the manuscript is available on our site with no access controls, subscription charges or pay-per-view fees (<http://bmjopen.bmj.com>).

If you have any questions on BMJ Open's open peer review process please email [info.bmjopen@bmj.com](mailto:info.bmjopen@bmj.com)

# BMJ Open

## Information needs among women taking part in primary HPV screening in England: A content analysis

|                               |                                                                                                                                                                                                                                                                                                                                                                                                                                                                                                                                                                                                                                                                                                         |
|-------------------------------|---------------------------------------------------------------------------------------------------------------------------------------------------------------------------------------------------------------------------------------------------------------------------------------------------------------------------------------------------------------------------------------------------------------------------------------------------------------------------------------------------------------------------------------------------------------------------------------------------------------------------------------------------------------------------------------------------------|
| Journal:                      | <i>BMJ Open</i>                                                                                                                                                                                                                                                                                                                                                                                                                                                                                                                                                                                                                                                                                         |
| Manuscript ID                 | bmjopen-2020-044630                                                                                                                                                                                                                                                                                                                                                                                                                                                                                                                                                                                                                                                                                     |
| Article Type:                 | Original research                                                                                                                                                                                                                                                                                                                                                                                                                                                                                                                                                                                                                                                                                       |
| Date Submitted by the Author: | 10-Sep-2020                                                                                                                                                                                                                                                                                                                                                                                                                                                                                                                                                                                                                                                                                             |
| Complete List of Authors:     | Marlow, Laura; King's College London, Cancer Prevention Group, School of Cancer and Pharmaceutical Sciences; University College London, Research Department of Behavioural Science and Health<br>Forster, Alice; UCL, Research Department of Behavioural Science and Health<br>McBride, Emily; University College London, Health Behaviour Research Centre<br>Rockliffe, Lauren; The University of Manchester, School of Health Sciences, Faculty of Biology, Medicine and Health<br>Kitchener, Henry; University of Manchester<br>Waller, Jo; King's College London, Cancer Prevention Group, School of Cancer and Pharmaceutical Sciences; UCL, Research Department of Behavioural Science and Health |
| Keywords:                     | Public health < INFECTIOUS DISEASES, PREVENTIVE MEDICINE, PRIMARY CARE, QUALITATIVE RESEARCH                                                                                                                                                                                                                                                                                                                                                                                                                                                                                                                                                                                                            |
|                               |                                                                                                                                                                                                                                                                                                                                                                                                                                                                                                                                                                                                                                                                                                         |

SCHOLARONE™  
Manuscripts

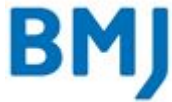

I, the Submitting Author has the right to grant and does grant on behalf of all authors of the Work (as defined in the below author licence), an exclusive licence and/or a non-exclusive licence for contributions from authors who are: i) UK Crown employees; ii) where BMJ has agreed a CC-BY licence shall apply, and/or iii) in accordance with the terms applicable for US Federal Government officers or employees acting as part of their official duties; on a worldwide, perpetual, irrevocable, royalty-free basis to BMJ Publishing Group Ltd ("BMJ") its licensees and where the relevant Journal is co-owned by BMJ to the co-owners of the Journal, to publish the Work in this journal and any other BMJ products and to exploit all rights, as set out in our [licence](#).

The Submitting Author accepts and understands that any supply made under these terms is made by BMJ to the Submitting Author unless you are acting as an employee on behalf of your employer or a postgraduate student of an affiliated institution which is paying any applicable article publishing charge ("APC") for Open Access articles. Where the Submitting Author wishes to make the Work available on an Open Access basis (and intends to pay the relevant APC), the terms of reuse of such Open Access shall be governed by a Creative Commons licence – details of these licences and which [Creative Commons](#) licence will apply to this Work are set out in our licence referred to above.

Other than as permitted in any relevant BMJ Author's Self Archiving Policies, I confirm this Work has not been accepted for publication elsewhere, is not being considered for publication elsewhere and does not duplicate material already published. I confirm all authors consent to publication of this Work and authorise the granting of this licence.

## Information needs among women taking part in primary HPV screening in England: A content Analysis

Running title: HPV information needs

Laura A.V Marlow (corresponding author)<sup>1,2\*</sup>

<sup>1</sup> School of Cancer & Pharmaceutical Sciences, Faculty of Life Sciences & Medicine, King's College London

<sup>2</sup> Department of Behavioural Science and Health, UCL

Alice S Forster<sup>2</sup>

<sup>2</sup> Department of Behavioural Science and Health, UCL

Emily McBride<sup>2</sup>

<sup>2</sup> Department of Behavioural Science and Health, UCL

Lauren Rockliffe<sup>2</sup>

<sup>3</sup> School of Health Sciences, Faculty of Biology, Medicine and Health, University of Manchester

<sup>2</sup> Department of Behavioural Science and Health, UCL

Henry Kitchener

<sup>4</sup> Institute of Cancer Science, University of Manchester

Jo Waller<sup>1,2</sup>

<sup>1</sup> School of Cancer & Pharmaceutical Sciences, Faculty of Life Sciences & Medicine, King's College London

<sup>2</sup> Department of Behavioural Science and Health, UCL

\* corresponding author at:

Address: Room GH0603334, 3<sup>rd</sup> Floor, Research Oncology, Bermondsey Wing, Guy's Hospital, Great Maze Pond, London SE1 9RT, UK

Email: l.marlow@kcl.ac.uk

Phone: 020 78484675

### Funding

Our study was funded by Public Health England (PHE, no grant number was given). PHE funded Emily McBride from 03/01/2016 until 30/09/2017. EM was funded by the National Institute for Health Research (NIHR) from 01/10/2017 [grant number DRF-2017-10-105]; the views expressed in this article are not necessarily those of the NHS, the NIHR or the Department of Health and Social Care. JW, LM and AF are funded by Cancer Research UK (grant numbers C7492/A17219 and C49896/A17429).

### Competing interests

The authors declare no conflict of interest.

## Abstract

Objectives: Introducing primary HPV testing to cervical screening programmes means changes to the results women receive. We explored additional information needs among women undergoing HPV primary screening.

Design: Women were sent a postal questionnaire shortly after receiving their results and 6 and 12 months later. Each questionnaire asked if women had any unanswered questions about cervical screening or HPV testing. Free-text responses constituted the data. Themes were identified using Content Analysis.

Setting: NHS Cervical Screening Programme, England

Participants: 381 women who recorded one or more free-text responses.

Results: The most common theme represented women's emotional responses and attempts to understand their results. This theme was raised by 45% of women overall, but was as high as 59% in the HPV cleared group. General questions about the cause and epidemiology of HPV were raised by 38% of women and were more common among those testing HPV Positive with normal cytology (52%). Questions about the purpose and procedure for HPV testing were most common among HPV-negative women (40%, compared to 16%-25% of the other results groups). Questions about future implications of test results, were raised by 20% of women, and this theme was most common among those with persistent HPV.

Conclusions: Despite provision of information alongside screening invitations, women can still have unanswered questions following receipt of their results. Details about the epidemiology of HPV and why cervical screening procedures are changing should be included with screening invitations. Some results groups may benefit from additional tailored information with their result letter.

### Strengths and limitations of this study

- Participants had been tested for HPV as part of routine cervical screening
- Participants represented a range of test results
- Two thirds of women did not leave a free-text response.
- Questionnaires were completed at least two weeks after receiving results.
- Those with less education were less likely to leave a free-text comment.

### Keywords

cervical screening, HPV testing, information, informed choice, concerns, misunderstanding

## Introduction

Cervical screening programmes have traditionally involved looking for abnormal cytology but HPV primary screening can provide many benefits [1] and has already replaced cytology-based cervical screening in England, Australia, the Netherlands and Wales, and several other countries are expected to follow in the coming years [2,3]. HPV testing looks for presence of the HPV virus. Where HPV is found the sample is looked at for cytology. Women with HPV positive/abnormal cytology results are referred for colposcopy, women with HPV positive/normal cytology are recalled 12 months later. Based on a large pilot study in England, around 13% of women aged 25-64 years will be told they are HPV positive [4,5], compared with ~6% who currently receive an abnormal cytology result (with or without HPV). These figures are expected to decrease dramatically as cohorts offered HPV vaccination move into the programme. Nevertheless, many women will be receiving an HPV positive result, warranting careful consideration of how these results are communicated.

Of particular concern is that some women will be learning about the link between cervical cancer and a sexually transmitted infection (STI) for the first time, which may come as a shock and could raise concerns about sexual relationships [6-8]. In a review of studies exploring understanding of HPV and information needs [9], women found it difficult to incorporate new information about HPV testing into their pre-existing understanding of cervical screening and often sought additional information after being told they were HPV-positive. The review identified uncertainty about HPV transmission, prevention, symptoms, risk factors (for HPV and cervical cancer), whether HPV could cause other cancers, treatment, fertility and the natural history of the virus. However, most of the studies included were small qualitative studies carried out before 2007, half of which used samples of women who had not actually been tested for HPV. More recently, qualitative interviews with women who were told they were HPV positive in an HPV self-sampling trial, identified some key themes: intense affect (feelings and emotions) after receiving positive results, importance of discussing results with a provider, information seeking, confusion about purpose and meaning of HPV versus Pap tests [10].

Establishing women's information needs in the context of primary screening is vital to inform patient education and communication strategies. Clear information provided at the appropriate time-point (e.g. alongside results) may help to minimise the adverse psychological responses to HPV-positive results that have been identified [11]. The aims of this study were to i) identify the information needs of women participating in primary HPV screening and ii) to explore how these might vary according to women's HPV and cytology results. This study is part of a broader psychological evaluation of HPV primary testing in England [12].

## Methods

### *Participants*

Participants were women aged 24-65 years who attended for cervical screening in England in one of five sites piloting HPV primary testing (between 2016 and 2017). Recruitment was stratified to ensure data were collected from women receiving different screening results (see Supplementary Figure 1): i) negative for HPV, ii) HPV-positive with normal cytology and iii) HPV-positive with abnormal cytology.

We also recruited two groups of women who had initially tested positive for HPV with normal cytology, and who had re-attended at 12-month follow-up and either iv) had persistent HPV i.e. they were still HPV-positive with normal cytology or v) had cleared the infection i.e. they now tested HPV negative. A group of women undergoing conventional cytology screening were also recruited but we have excluded their data from the present analyses.

### *Procedure*

The data reported here were collected from cross-sectional surveys sent to women at three time points: shortly after receiving their results (baseline), 6-months, and 12-months. The full protocol is available elsewhere [12], but in brief women were contacted by post within two weeks of receiving their screening result letter and invited to complete and return a consent form and questionnaire. Women who returned the questionnaire were also sent questionnaires 6 and 12 months later. The primary outcome measures assessed in the questionnaire were anxiety and general distress [11]. Health Research Authority (HRA) approval was granted on 26/09/2016 (Research Ethics Committee reference: 16/LO/0902 and Confidentiality Advisory Group reference: 16/CAG/0047). We did not use any Patients or public involvement in the design, conduct, or reporting of this study.

### *Measures*

At each of the three time-points, women were asked "Do you have any unanswered questions about cervical screening or HPV testing?" and space for an open response was provided. Free-text responses to this question constituted the primary data for analyses. At the end of the baseline questionnaire there was also a space provided for "any other comments". Free-text responses recorded here were also included where they were relevant to the aims of this analysis (irrelevant comments were excluded, for example comments about practical aspects of the survey study). Socio-demographic information including age, marital status, education and ethnicity were also collected. Information on women's screening results was collected directly from the screening laboratories.

### *Analysis*

1  
2  
3 Content analysis was used to explore women's free-text responses. Responses from all three time  
4 points were analysed together. Content analysis can be defined as "subjective interpretation of the  
5 content of text data through the systematic classification process of coding and identifying themes"  
6 [13]. Responses were typed into an excel spreadsheet and two authors (LR and EM) immersed  
7 themselves in the baseline data. An initial coding frame was developed using an inductive,  
8 conventional content analysis approach (i.e. avoiding preconceived categories) [14]. Three senior  
9 members of the research team then coded the data for 20% of the baseline participants (n=60),  
10 before refining the coding frame. All responses (from each time point) were then independently  
11 double coded. Any discrepancies were discussed. Multiple codes were allocated to individual  
12 responses when appropriate. We used 2-by-5 chi-square tests to explore differences in the  
13 proportion of women citing each major theme by result group. Sub-themes are reported  
14 descriptively.

## 23 Results

24  
25 Overall 921 women who had undergone HPV primary screening returned their baseline  
26 questionnaire (see Figure 1). A total of 507 free-text responses were recorded (baseline=329/921, 6  
27 months=110/762 and 12 months =68/537). Women testing HPV-positive with normal cytology and  
28 those with persistent HPV were most likely to leave a free-text response (50%); HPV-negative  
29 women were least likely (26%) to do so. Free-text responses were also more common among  
30 women in the youngest age group and those with a degree qualification (see Table 1 for sample  
31 characteristics). We have described each theme below with the prevalence of themes reported in  
32 Table 2 (overall and by results group). Illustrative examples of women's comments are presented in  
33 Table 3.

### 41 *Reaction to and understanding of results*

42  
43 Across all results groups (except HPV-negative), the most common theme was 'reaction to and  
44 understanding of results'. This theme was most frequently present in comments made by HPV  
45 positive women (with normal or abnormal cytology, 51% and 54% respectively) and by women who  
46 had cleared HPV at 12-months (59%). Women expressed a wide range of emotional responses to  
47 their results including shock, worry and relief. Comments included questions about the exact  
48 meaning of their result, including clarification about which HPV type they had. Implications for  
49 sexual relationships were raised by a number of women, including requests for clarification of what  
50 their result meant for future sexual relationships, concern about re-infection within a relationship  
51 and the possible consequences of infection for their partner. A lack of confidence in HPV results and  
52 requests for cytology were recorded by 5% of women (12% of women who were HPV negative and  
53 21% had cleared HPV). Having previously experienced an abnormal result or approaching the end of  
54  
55  
56  
57  
58  
59  
60



1  
2  
3 cervical screening eligibility were reasons that women gave for concern about not having a cytology  
4 test.  
5

#### 6 *Questions about HPV and cervical cancer*

7  
8 Over a third of women who left a comment recorded a question about HPV (38%) and this was more  
9 common among women who were HPV-positive with normal cytology (52%) or who had persistent  
10 HPV (41%). Women asked about various aspects of HPV epidemiology including questions about the  
11 timeline of infection, latency and clearance. Women's questions about HPV also included requests  
12 for clarification about the cause of their HPV, frequently including references to their long-term or  
13 sexual relationships. The potential for preventing future HPV infections and treating current ones  
14 was also raised. Some women expressed a more general lack of understanding about HPV, saying  
15 they had never heard of it or did not know what it was.  
16  
17

18  
19 A smaller number of women provided comments about cervical cancer (14% across all results  
20 groups). A range of general questions were raised about the risk of developing cervical cancer. Some  
21 women also asked about other specific causal risk factors for cervical cancer (e.g. polycystic ovary  
22 syndrome, contraceptive implants, previous cancer diagnosis or treatment).  
23  
24

#### 25 *Purpose and procedure for HPV testing*

26  
27 'Purpose and procedure for HPV testing' was the most common theme for HPV-negative women  
28 (40%) but was also raised by HPV-positive women (16-24%) and women who had cleared HPV (24%).  
29 Questions about the purpose of HPV testing were predominantly to clarify how HPV testing fit with  
30 their existing knowledge of cervical screening, but some women mentioned being unaware they had  
31 been tested for HPV until they received their results. Some HPV-negative women wanted to clarify  
32 whether their sample had been cytology tested or why cytology was not also performed.  
33  
34

35  
36 Women also made comments about the timing of tests, particularly in relation to repeat HPV  
37 testing. They wanted to be reassured that the recommended intervals were 'soon enough' or  
38 'adequate'. Several women also commented on the delivery of their results, for example saying that  
39 the results had not been clear from the letter they received and that further discussion with their GP  
40 had been needed.  
41  
42

#### 43 *Future implications of test results*

44  
45 The theme 'Future implications of the results' was identified in 19% of the comments and was most  
46 commonly recorded for women with persistent HPV (30%). These comments related specifically to  
47 clinical management, with requests for clarification about what would happen next for them.  
48 Implications for fertility, for their partners being tested and advice on clearing HPV was mentioned  
49 by a few women.  
50  
51  
52  
53  
54  
55  
56  
57  
58  
59  
60

### *Information seeking and (di)satisfaction*

Some women described their experiences of seeking additional information about HPV. This predominantly included experiences of searching online or contacting their GP surgery to discuss their result further (with a GP or nurse) and was recorded for 22% of those leaving a comment. A number of women indicated satisfaction, or more commonly lack of satisfaction, with the information they had received.

### **Discussion**

This study found women undergoing primary HPV testing for cervical screening can have additional information needs after receiving their results. Requests for more information about the epidemiology and cause of HPV were common across all results groups, so this seems to be important information to communicate to women taking part in screening. Other questions were more common among women receiving particular results; for example women receiving an HPV positive result (with normal cytology) often had questions about the meaning of this result and wanted advice about the implications for sexual relationships. Women with abnormal cytology seemed to have fewer questions about HPV and the meaning of their result, but expressed more worry and concern. This suggests there may be merit in including results-tailored information alongside the delivery of results. However, the wide range of themes identified and the personalised nature of many questions means signposting to additional information will also be important.

Some of our themes relating to women's understanding of HPV and cervical cancer were similar to other studies [8,9], supporting the need to provide women with information about the cause and epidemiology of HPV. Women's desire to develop a coherent model of what HPV is, the timeline of infection and its cause and consequences is supported by theoretical models of illness representation which suggest that these aspects are important for understanding HPV and cervical cancer and consequently for coping with being given an HPV-positive result [15,16].

Previous studies have suggested that women are often shocked to learn about the sexually transmitted nature of HPV [6,7]. Implications for sexual relationships was not the most common theme identified and while this question was raised by some women (particularly those who test HPV-positive with normal cytology), it is reassuring that this was not more widespread in women's responses. Some themes such as the impact of HPV on fertility or questions about the impact for male partners, were raised by very few women suggesting these are unlikely to be major areas of concern.

1  
2  
3 The main strength of this study is that we included women who had been tested for HPV as part of  
4 routine cervical screening, meaning we were able to compare responses across results groups.  
5  
6 However, there are some limitations. The overall response rate for the questionnaire was low and of  
7 those responding, less than half recorded a free-text response. We cannot be sure if women who  
8 chose not to leave a free-text response had no information needs or just did not state them. In  
9  
10 addition, since the questionnaires were completed at least two weeks after receiving results, women  
11 may already have sought answers to any questions they initially had. It is therefore likely that our  
12 study underestimates the number of questions women have upon receiving their result. Women  
13 from lower socio-economic backgrounds were less likely to return the questionnaire [11] and those  
14 with less education were less likely to leave a free-text comment. It is therefore possible that the  
15 results under-represent the concerns of women from lower socio-economic backgrounds.

16  
17 A number of implications arise from this study. Firstly, it is important that women are made aware of  
18 HPV before being tested. For some women, including information about HPV in invitation letters will  
19 not be sufficient so sample-takers have an important role in ensuring women know they are having  
20 an HPV test. In some instances, this may be simply by drawing their attention to the information  
21 leaflet that they receive with their screening invitation, but for some women this will lead to  
22 additional questions which sample-takers should be prepared to answer.

23  
24 Secondly, information provided to women alongside their results should ideally be tailored to the  
25 result being communicated. Many of the women who were HPV-positive or had recently cleared  
26 HPV had questions about the meaning of their result and some described contacting their GP  
27 surgery to discuss this. This is consistent with findings in the US, where women receiving HPV  
28 positive results felt a sense of urgency to discuss it with their Health care provider and felt reassured  
29 after this had happened [10]. It is important that staff in primary care are well equipped to answer  
30 women's questions or to direct them to the best source of information. This may involve answering  
31 questions about HPV themselves or directing women to online information materials (e.g. the NHS  
32 screening website). In particular, the information needs recorded by women were frequently  
33 interlinked with their personal information and medical history, reflecting attempts to make sense of  
34 their results. There are likely to be women who want to discuss their specific results and this might  
35 also include how their risk relates to their past screening history or other health conditions. For  
36 these women, knowing who they can contact (e.g. a specific helpline, a cancer charity helpline, their  
37 GP) will be important.

38  
39 Finally, for some women there was confusion about why changes were being made to the screening  
40 programme and concern about the fact that their sample had not been checked for abnormal cells.  
41 It is important to explain why screening is changing and to reassure women that HPV testing is

1  
2  
3 better than cytology, with the changes being made to improve the screening programme. It might  
4 also be useful to clarify specifically that this is safe even for women who are at the end of screening  
5 (mentioned by some women in their 60s) or those who have previously had abnormal cytology  
6 results. The recent public backlash following changes to the cervical screening programme in  
7 Australia has highlighted the importance of explaining the rationale behind and safety of changes  
8 being made in public health [17].  
9

10  
11  
12  
13 Women taking part in HPV-based cervical screening continue to have additional information needs.  
14 Information about the epidemiology of HPV, why the cervical screening procedure is changing and  
15 the meaning and implications of different results, should be provided in materials accompanying  
16 results. Tailored information and signposting to additional materials and resources would also help  
17 to ensure women can find the information they need  
18  
19  
20  
21  
22  
23

#### 24 25 **Author contributions**

26  
27 JW, LM, AF and HK conceived the study. JW, LM, EM and AF developed the measures. EM and JW  
28 managed the project. All authors contributed to the analyses. LM drafted the paper. All authors  
29 contributed to the final version of the manuscript. We would like to thank all the laboratory staff  
30 who made recruiting for the psychological evaluation possible, as well as Kirsty Bennett and Fatima  
31 Osmani who contributed to recruitment and data entry. We also thank Julieta Patnick for her helpful  
32 comments.  
33  
34  
35  
36  
37  
38

#### 39 **Data sharing statement**

40 Data is available from the corresponding author upon reasonable request.  
41  
42  
43  
44

#### 45 **Patient and public involvement**

46 No patient involved.  
47  
48  
49  
50

#### 51 **References**

- 52  
53 [1] Schiffman M, Wentzensen N, Wacholder S, Kinney W, Gage JC, Castle PE. Human  
54 papillomavirus testing in the prevention of cervical cancer. *J Natl Cancer Inst* 2011;103:368-83.  
55 [2] Wentzensen N, Arbyn M, Berkhof J, Bower M, Canfell K, Einstein M et al. Eurogin 2016  
56 Roadmap: how HPV knowledge is changing screening practice. *Int J Cancer* 2017;140:2192-200.  
57  
58  
59  
60

- 1  
2  
3 [3] Cuschieri K, Ronco G, Lorincz A, Smith L, Ogilvie G, Mirabello L et al. Eurogin roadmap 2017:  
4 Triage strategies for the management of HPV-positive women in cervical screening programs. *Int J*  
5 *Cancer* 2018;143:735-45.  
6  
7  
8 [4] Kitchener HC, Almonte M, Gilham C, Dowie R, Stoykova B, Sargent A et al. ARTISTIC: a  
9 randomised trial of human papillomavirus (HPV) testing in primary cervical screening. *Health Technol*  
10 *Assess* 2009;13:1-150, iii-iv.  
11  
12  
13 [5] Rebolj M, Rimmer J, Denton K, Tidy J, Mathews C, Ellis K et al. Primary cervical screening  
14 with highrisk human papillomavirus testing: observational study. *BMJ* 2019;364:l240.  
15  
16 [6] Waller J, McCaffery K, Nazroo J, Wardle J. Making sense of information about HPV in cervical  
17 screening: a qualitative study. *Br J Cancer* 2005;92:265-70.  
18  
19  
20 [7] McCaffery K, Forrest S, Waller J, Desai M, Szarewski A, Wardle J. Attitudes towards HPV  
21 testing: a qualitative study of beliefs among Indian, Pakistani, African-Caribbean and white British  
22 women in the UK. *Br J Cancer* 2003;88:42-6.  
23  
24  
25 [8] Patel H, Moss EL, Sherman SM. HPV primary cervical screening in England: Women's  
26 awareness and attitudes. *Psychooncology* 2018;27:1559-64.  
27  
28 [9] Hendry M, Pasterfield D, Lewis R, Clements A, Damery S, Neal RD et al. Are women ready for  
29 the new cervical screening protocol in England? A systematic review and qualitative synthesis of  
30 views about human papillomavirus testing. *Br J Cancer* 2012;107:243-54.  
31  
32  
33 [10] Tiro JA, Betts AC, Kimbel K, et al. (2019) Understanding Patients' Perspectives and  
34 Information Needs Following a Positive Home Human Papillomavirus Self-Sampling Kit Result. *J*  
35 *Womens Health (Larchmt) (United States)*, 28(3) p384-392  
36  
37  
38 [11] McBride E, Marlow LAV, Forster AS, Ridout D, Kitchener H, Patnick J et al. Anxiety and  
39 distress following receipt of results from routine HPV primary testing in cervical screening: The  
40 psychological impact of primary screening (PIPS) study. *Int J Cancer* 2020;146(8):2113-2121.  
41  
42  
43 [12] McBride E, Marlow L, Forster AS, Moss S, Myles J, Kitchener H et al. Psychological Impact of  
44 Primary Screening (PIPS) for HPV: a protocol for a cross-sectional evaluation within the NHS cervical  
45 screening programme. *BMJ Open* 2016;6:e014356.  
46  
47  
48 [13] Hsieh HF, Shannon SE. Three approaches to qualitative content analysis. *Qual Health Res*  
49 2005;15:1277-88.  
50  
51  
52 [14] Kondracki NL, Wellman NS, Amundson DR. Content analysis: review of methods and their  
53 applications in nutrition education. *J Nutr Educ Behav* 2002;34:224-30.  
54  
55 [15] Leventhal H, Meyer D, Nerenz D. The common sense representation of illness danger. In:  
56 Rachman S, ed. *Contributions to Medical Psychology*. New York: Pergamon Press 1980:7-30.  
57  
58  
59  
60

1  
2  
3 [16] Marlow LA, Wardle J, Grant N, Waller J. Human papillomavirus (HPV) information needs: a  
4 theoreticl framework. *J Fam Plann Reprod Health Care* 2009;35:29-33.

5  
6 [17] Smith M, Hammond I, Saville M. Lessons from the renewal of the National Cervical Screening  
7 Program in Australia. *Public Health Res Pract* 2019;29:2921914  
8  
9

10  
11  
12  
13  
14  
15  
16  
17  
18  
19  
20  
21  
22  
23  
24  
25  
26  
27  
28  
29  
30  
31  
32  
33  
34  
35  
36  
37  
38  
39  
40  
41  
42  
43  
44  
45  
46  
47  
48  
49  
50  
51  
52  
53  
54  
55  
56  
57  
58  
59  
60

For peer review only

**Table 1: Sample characteristics of women participating in HPV primary testing who did and did not record a free-text response during the course of the study (n=921)**

|                                 | Free-text response recorded at any time |       | No free-text response recorded |       | $\chi^2$ (df), p-value    |
|---------------------------------|-----------------------------------------|-------|--------------------------------|-------|---------------------------|
|                                 | N                                       | Row % | n                              | Row % |                           |
| Overall                         | 381                                     | 41.4  | 540                            | 58.6  |                           |
| Result group                    |                                         |       |                                |       |                           |
| HPV negative                    | 65                                      | 26.2  | 183                            | 73.8  | $\chi^2(4)=38.49, p<.001$ |
| HPV positive, cytology normal   | 126                                     | 50.0  | 129                            | 50.0  |                           |
| HPV positive, cytology abnormal | 67                                      | 39.4  | 103                            | 60.6  |                           |
| Persistent HPV                  | 91                                      | 50.8  | 88                             | 49.2  |                           |
| Cleared HPV                     | 29                                      | 43.9  | 37                             | 56.1  |                           |
| Age                             |                                         |       |                                |       |                           |
| 24-34                           | 171                                     | 46.7  | 195                            | 53.3  | $\chi^2(3)=10.63, p=.014$ |
| 35-44                           | 66                                      | 32.7  | 136                            | 67.3  |                           |
| 45-54                           | 80                                      | 41.0  | 115                            | 59.0  |                           |
| 55-65                           | 64                                      | 41.0  | 92                             | 59.0  |                           |
| Marital status*                 |                                         |       |                                |       |                           |
| Current partner                 | 281                                     | 40.7  | 410                            | 59.3  | $\chi^2(1)=.79, p=.375$   |
| No partner                      | 95                                      | 44.4  | 119                            | 55.6  |                           |
| Education**                     |                                         |       |                                |       |                           |
| Degree or higher                | 189                                     | 48.8  | 198                            | 51.2  | $\chi^2(2)=14.62, p=.001$ |
| Qualifications below degree     | 177                                     | 36.0  | 314                            | 64.0  |                           |
| No formal qualifications        | 7                                       | 38.9  | 11                             | 61.1  |                           |
| Ethnicity                       |                                         |       |                                |       |                           |
| White (British or other)        | 356                                     | 42.7  | 527                            | 57.3  | $\chi^2(1)=4.77, p=.029$  |
| Other ethnicity***              | 20                                      | 28.6  | 50                             | 71.4  |                           |

\*Marital status: current partner (married, civil partnership, living with partner, in a relationship) and no partner (single, divorced, widowed). \*\*No formal qualifications included those with no qualifications and those who were still studying with no previous qualifications. \*\*\*Other ethnicity includes: Asian/Asian British, Black/African/Caribbean/Black British, Mixed/Multiple ethnic groups, other ethnic group.

NOTE: Where n does not add up to n=921, this is due to missing data

**Table 2: Number of women mentioning each major and sub-theme overall and by test result group**

|                                                 | Overall<br>(n=381) | HPV<br>negative<br>(n=65) | HPV<br>positive,<br>cytology<br>normal<br>(n=129) | HPV<br>positive,<br>cytology<br>abnormal<br>(n=67) | Persistent<br>HPV<br>(n=91) | Cleared<br>HPV<br>(n=29) | $\chi^2$ (df),<br>p-value   |
|-------------------------------------------------|--------------------|---------------------------|---------------------------------------------------|----------------------------------------------------|-----------------------------|--------------------------|-----------------------------|
|                                                 | n (%)              | n (%)                     | n (%)                                             | n (%)                                              | n (%)                       | n (%)                    |                             |
| <b>Reaction to and understanding of results</b> | <b>170 (45)</b>    | <b>11 (17)</b>            | <b>69 (54)</b>                                    | <b>34 (51)</b>                                     | <b>39 (43)</b>              | <b>17 (59)</b>           | $\chi^2(4)=27.72,$<br>.001  |
| Emotional response                              | 85 (22)            | 5 (8)                     | 28 (22)                                           | 24 (36)                                            | 18 (20)                     | 10 (35)                  |                             |
| Meaning of results                              | 72 (19)            | 1 (2)                     | 35 (27)                                           | 11 (16)                                            | 21 (23)                     | 4 (14)                   |                             |
| Impact on sexual relationships                  | 41 (11)            | 0                         | 25 (19)                                           | 4 (6)                                              | 11 (12)                     | 1 (3)                    |                             |
| Confidence in results                           | 20 (5)             | 8 (12)                    | 4 (3)                                             | 1 (2)                                              | 1 (1)                       | 6 (21)                   |                             |
| <b>Questions about HPV</b>                      | <b>143 (38)</b>    | <b>8 (12)</b>             | <b>67 (52)</b>                                    | <b>20 (30)</b>                                     | <b>37 (41)</b>              | <b>11 (38)</b>           | $\chi^2(4)=31.13,$<br><.001 |
| General lack of understanding                   | 24 (7)             | 2 (3)                     | 15 (12)                                           | 6 (9)                                              | 4 (4)                       | 0                        |                             |
| Epidemiology of HPV                             | 63 (17)            | 2 (3)                     | 30 (23)                                           | 5 (8)                                              | 20 (22)                     | 6 (21)                   |                             |
| Cause of HPV                                    | 32 (8)             | 1 (2)                     | 20 (16)                                           | 3 (5)                                              | 6 (7)                       | 2 (7)                    |                             |
| Prevention/Treatment of HPV                     | 28 (7)             | 0                         | 11 (9)                                            | 7 (10)                                             | 9 (10)                      | 1 (3)                    |                             |
| HPV vaccination                                 | 39 (10)            | 3 (5)                     | 20 (16)                                           | 2 (3)                                              | 11 (12)                     | 3 (10)                   |                             |
| <b>Questions about cervical cancer</b>          | <b>52 (14)</b>     | <b>5 (8)</b>              | <b>24 (19)</b>                                    | <b>7 (10)</b>                                      | <b>14 (15)</b>              | <b>2 (7)</b>             | $\chi^2(4)=6.58,$<br>.160   |
| Risk of cervical cancer                         | 45 (12)            | 3 (3)                     | 20 (16)                                           | 7 (10)                                             | 14 (15)                     | 2 (7)                    |                             |
| Other cervical cancer risk factors              | 14 (4)             | 3 (5)                     | 7 (5)                                             | 1 (2)                                              | 2 (2)                       | 1 (3)                    |                             |
| <b>Purpose and procedure for HPV testing</b>    | <b>85 (22)</b>     | <b>26 (40)</b>            | <b>20 (16)</b>                                    | <b>16 (24)</b>                                     | <b>16 (18)</b>              | <b>7 (24)</b>            | $\chi^2(4)=16.51,$<br>.002  |
| Purpose                                         | 22 (6)             | 11 (17)                   | 5 (4)                                             | 4 (6)                                              | 2 (2)                       | 0                        |                             |
| Procedure                                       | 18 (5)             | 10 (15)                   | 3 (2)                                             | 1 (2)                                              | 0                           | 4 (14)                   |                             |
| Timing                                          | 36 (9)             | 4 (6)                     | 12 (9)                                            | 5 (8)                                              | 11 (12)                     | 4 (14)                   |                             |
| Delivery of results                             | 15 (4)             | 4 (6)                     | 1 (1)                                             | 7 (10)                                             | 3 (3)                       | 0                        |                             |
| <b>Future implications of test results</b>      | <b>73 (19)</b>     | <b>1 (2)</b>              | <b>30 (23)</b>                                    | <b>10 (15)</b>                                     | <b>27 (30)</b>              | <b>5 (17)</b>            | $\chi^2(4)=21.76,$<br><.001 |
| Clinical management                             | 39 (10)            | 1(2)                      | 14(11)                                            | 4 (6)                                              | 19 (21)                     | 1 (4)                    |                             |
| Fertility/sexual health                         | 13 (3)             | 0                         | 5 (4)                                             | 1 (3)                                              | 3 (3)                       | 3 (10)                   |                             |
| Advice on clearing HPV                          | 18 (5)             | 0                         | 10 (8)                                            | 2 (3)                                              | 5 (6)                       | 1 (3)                    |                             |
| Testing for partners                            | 7 (2)              | 0                         | 4 (3)                                             | 2 (3)                                              | 1 (1)                       | 0                        |                             |
| <b>Information seeking/(di)satisfaction</b>     | <b>85 (22)</b>     | <b>8 (12)</b>             | <b>37 (29)</b>                                    | <b>14 (21)</b>                                     | <b>22 (24)</b>              | <b>4 (14)</b>            | $\chi^2(4)=8.25,$<br>.083   |
| Information seeking                             | 30 (8)             | 3 (5)                     | 15 (12)                                           | 7 (10)                                             | 5 (6)                       | 0                        |                             |
| (Di)satisfaction                                | 73 (19)            | 6 (9)                     | 31 (24)                                           | 12 (18)                                            | 20 (22)                     | 4 (14)                   |                             |



**Table 3: Examples of each quote**

| Reaction to and understanding of results |                                                                                                                                                                                                                                                                                                                                                                                                                                                                                                                        |
|------------------------------------------|------------------------------------------------------------------------------------------------------------------------------------------------------------------------------------------------------------------------------------------------------------------------------------------------------------------------------------------------------------------------------------------------------------------------------------------------------------------------------------------------------------------------|
| Emotional response                       | <p><i>"I am very worried in case I end up with cervical cancer"</i> [HPV+, cyto norm; 55-65 years]</p> <p><i>"I feel quite distressed about the results and the letter ... has caused me stress and anxiety"</i> [HPV+, cyto abnorm; 24-34 years]</p> <p><i>"I was advised I do not have HPV, I have had this persistently for years, I am so relieved"</i> [HPV cleared; 24-34 years]</p>                                                                                                                             |
| Confidence in results                    | <p><i>"I have a family history of abnormal cells being found, but I was not tested for anything other than HPV. I would like to have a further test to confirm no abnormal cells"</i> [HPV-; 35-44 years]</p> <p><i>"Because I have previously had abnormal cells... I was not reassured by my HPV-negative result"</i> [HPV-; 45-54 years]</p> <p><i>"I am uneasy about the fact that cells have not been checked for abnormality, especially as no further tests will be offered to me"</i> [HPV -; 55-65 years]</p> |
| Meaning of results                       | <p><i>"I was cleared of HPV last year, why has it come back?"</i> [HPV+, cyto norm; 45-54 years]</p> <p><i>"I have had two smears now both HPV-positive. How long can a person be HPV-positive for HPV?"</i> [HPV persistent; 45-54 years]</p> <p><i>"My previous test was positive and this one was negative. Does this mean it is still present but not active?"</i> [HPV cleared; 24-34 years] <i>"I caught genital warts at 23 - is this somehow different?"</i> [HPV+, cyto norm; 24-34 years]</p>                |
| Impact on sexual relationships           | <p><i>"Not sure what this means for future sexual relationships"</i> [HPV+, cyto abnorm; 24-34 years]</p> <p><i>"Can it be perpetuated by continuously being passed from one partner to the other?"</i> [HPV+, cyto norm; 55-65 years]</p> <p><i>"Should I tell sexual partners?"</i> [HPV+, cyto norm; 24-34 years]</p> <p><i>"Initially I worried about what my husband would think"</i> [HPV persistent; 55-65 years]</p> <p><i>"I blame my partner for this"</i> [HPV+, cyto norm; 35-44 years]</p>                |
| Questions about HPV                      |                                                                                                                                                                                                                                                                                                                                                                                                                                                                                                                        |
| General lack of understanding            | <p><i>"I didn't even know I had been tested for HPV. Have never heard of it before"</i> [HPV+, cyto norm; 35-44 years]</p> <p><i>"I don't really understand what HPV is"</i> [HPV+, cyto norm; 24-34 years]</p>                                                                                                                                                                                                                                                                                                        |
| Epidemiology of HPV                      | <p><i>"How long does HPV last? What will happen if it doesn't go away?"</i> [HPV+, cyto norm; 24-34 years]</p> <p><i>"Has it gone and come back again or have I had it for 3 years?"</i> [HPV+, cyto norm; 35-44 years]</p> <p><i>"I'm still unclear as to what makes some peoples CIN1 cells disappear while others develop further"</i> [HPV+, cyto abnorm; 35-44 years]</p> <p><i>"Will it ever go away? Or get worse?"</i> [HPV persistent; 55-65 years]</p>                                                       |
| Cause of HPV                             | <p><i>"I don't understand how I have got HPV"</i> [HPV+, cyto norm; 24-34 years]</p> <p><i>"I have not been sexually active for 6 years and can't understand why I have got it with only having one long-term partner"</i> [HPV+, cyto abnorm; 35-44 years]</p>                                                                                                                                                                                                                                                        |
| Prevention/treatment for HPV             | <p><i>"Should I now always use condoms for sex?"</i> [HPV+, cyto norm; 24-34 years]</p> <p><i>"Is there something I can take to get rid of HPV?"</i> [HPV+, cyto norm; 35-44 years]</p> <p><i>"Are there really no ways to treat the HPV virus?"</i> [HPV persistent; 55-65 years]</p>                                                                                                                                                                                                                                 |

|                                              |                                                                                                                                                                                                                                                                                                                                                                                                                                              |
|----------------------------------------------|----------------------------------------------------------------------------------------------------------------------------------------------------------------------------------------------------------------------------------------------------------------------------------------------------------------------------------------------------------------------------------------------------------------------------------------------|
| HPV vaccination                              | <p><i>"I had the HPV vaccine, why didn't it work?"</i> [HPV+, cyto norm; 24-34 years]</p> <p><i>"I'd like to know if I could be offered the vaccine and whether it would work for me"</i> [HPV+, cyto norm; 35-44 years]</p> <p><i>"I have been considering having the vaccine but unsure of benefits at my age"</i> [HPV cleared; 35-44 years]</p>                                                                                          |
| <b>Questions about cervical cancer</b>       |                                                                                                                                                                                                                                                                                                                                                                                                                                              |
| Risk of cervical cancer                      | <p><i>"What are the chances of this becoming cancerous?"</i> [HPV+, cyto norm; 55-65 years]</p> <p><i>"What proportion of women who have had 2 smears detecting high risk HPV will go on to develop cervical cancer?"</i> [HPV persistent; 45-54 years]</p>                                                                                                                                                                                  |
| Other cervical cancer risk factors           | <p><i>"There is a vast history of cancer in my family. Am I more likely to get cancer?"</i> [HPV+, cyto norm; 55-65 years]</p> <p><i>"I have a contraception implant - does this affect HPV or my chances of developing cervical cancer"</i> [HPV+, cyto norm; 24-34 years]</p>                                                                                                                                                              |
| <b>Purpose and procedure for HPV testing</b> |                                                                                                                                                                                                                                                                                                                                                                                                                                              |
| Purpose                                      | <p><i>"I am not sure if HPV test covers more, less or the same as a normal smear test"</i> [HPV-; 45-54 years]</p> <p><i>"I do not know if one is more thorough and effective than the other"</i> [HPV-; 35-44 years]</p> <p><i>"Was given no information that would be a different test other than smear"</i> [HPV+, cyto norm; 45-54 years]</p>                                                                                            |
| Procedure                                    | <p><i>"Was the HPV an additional test in addition to a normal smear test?"</i> [HPV-; 45-54 years]</p> <p><i>"Why when HPV is not present they don't test the sample"</i> [HPV cleared; 24-34 years]</p>                                                                                                                                                                                                                                     |
| Timing                                       | <p><i>"Why can't I be re-tested in 6 months instead of waiting another year?"</i> [HPV+, cyto norm; 45-54 years]</p> <p><i>"Is having my next smear in 1 year soon enough? Could my cells change quickly enough to be cancerous before then?"</i> [HPV+, cyto norm; 45-54 years]</p> <p><i>"I would like to be reassured that the intervals between tests are adequate to pick up any changes to my body"</i> [HPV cleared; 35-44 years]</p> |
| Delivery of results                          | <p><i>"I haven't received a letter with my results and I don't ever recall receiving results"</i> [HPV-; 35-44 years]</p> <p><i>"I had lots of questions that I could not get answered because results come in letter form"</i> [HPV+, cyto abnorm; 24-34 years]</p>                                                                                                                                                                         |
| <b>Future implications of test results</b>   |                                                                                                                                                                                                                                                                                                                                                                                                                                              |
| Clinical management                          | <p><i>"My test was positive two times and I want to meet a specialist"</i> [HPV+, cyto norm; 45-54 years]</p> <p><i>"I had a second positive HPV and have not been invited for further testing which the nurse said I would be. I am wondering why"</i> [HPV persistent; 55-65 years]</p> <p><i>"Am I now having a colposcopy because I have had HPV for 2 years?"</i> [HPV persistent; 45-54 years]</p>                                     |
| Fertility/sexual health                      | <p><i>"I am due a second test in 1 years time, but I am hopefully aiming to be pregnant around then, is this a major problem?"</i> [HPV+, cyto norm; 24-34 years]</p> <p><i>"Will it increase my chances of miscarriage?"</i> [HPV persistent; 24-34 years]</p>                                                                                                                                                                              |
| Advice on clearing HPV                       | <p><i>"What can I do in the next 12 months to help myself?"</i> [HPV+, cyto norm; 24-34 years]</p> <p><i>"Is there anything I can do to stop HPV developing into cancer?"</i> [HPV persistent; 24-34 years]</p>                                                                                                                                                                                                                              |

1  
2  
3  
4  
5  
6  
7  
8  
9  
10  
11  
12  
13  
14  
15  
16  
17  
18  
19  
20  
21  
22  
23  
24  
25  
26  
27  
28  
29  
30  
31  
32  
33  
34  
35  
36  
37  
38  
39  
40  
41  
42  
43  
44  
45  
46

|                                                 |                                                                                                                                          |
|-------------------------------------------------|------------------------------------------------------------------------------------------------------------------------------------------|
| Testing for partners                            | <i>Why men don't get test for it if they can transmit it?</i> [HPV+, cyto abnorm; 24-34 years]                                           |
| <b>Information seeking and (di)satisfaction</b> |                                                                                                                                          |
| Information seeking                             | <i>"I contacted my GP for more information"</i> [HPV+, cyto norm; 24-34 years]                                                           |
| (Di)satisfaction                                | <i>"It's not explained in a very useful manner"</i> [HPV persistent; 24-34 years]                                                        |
|                                                 | <i>"I want to have more information about HPV"</i> [HPV+, cyto norm; 45-54 years]                                                        |
|                                                 | <i>"On receiving letter about results I felt I had lots of questions that I could not get answered"</i> [HPV+, cyto abnorm; 24-34 years] |

For peer review only

**Supplementary Figure 1: Overall response rate and proportion of women leaving a free-text response during the course of the study**

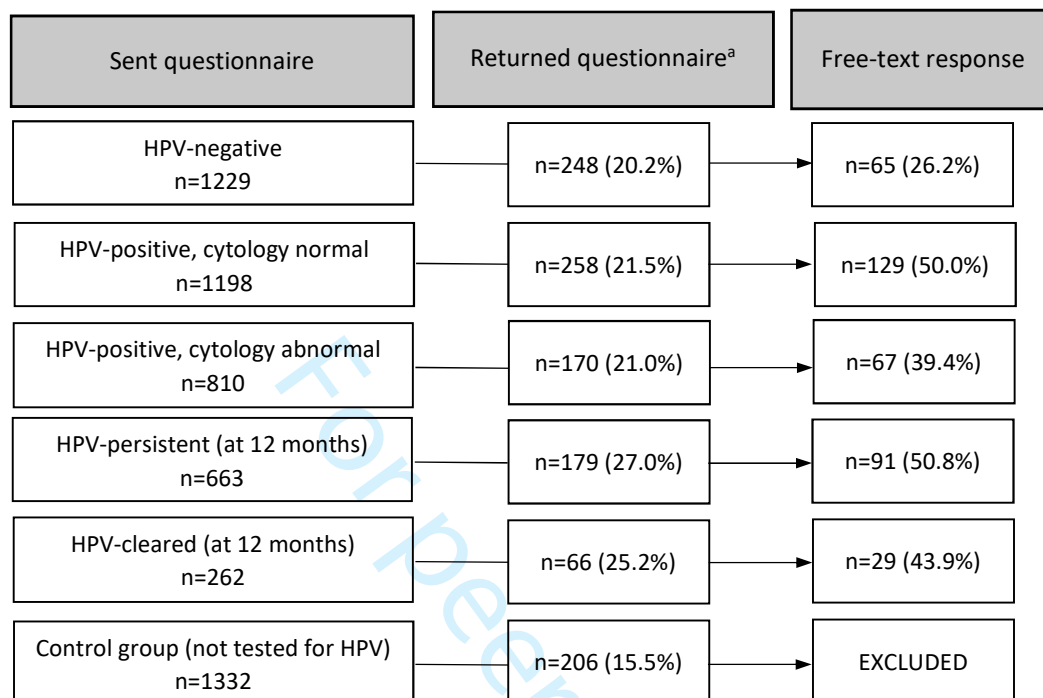

<sup>a</sup> Excluding questionnaires that were returned late or where participants were an ineligible age (n=21).

# BMJ Open

## Information needs among women taking part in primary HPV screening in England: A content analysis

|                                 |                                                                                                                                                                                                                                                                                                                                                                                                                                                                                                                                                                                                                                                                                                         |
|---------------------------------|---------------------------------------------------------------------------------------------------------------------------------------------------------------------------------------------------------------------------------------------------------------------------------------------------------------------------------------------------------------------------------------------------------------------------------------------------------------------------------------------------------------------------------------------------------------------------------------------------------------------------------------------------------------------------------------------------------|
| Journal:                        | <i>BMJ Open</i>                                                                                                                                                                                                                                                                                                                                                                                                                                                                                                                                                                                                                                                                                         |
| Manuscript ID                   | bmjopen-2020-044630.R1                                                                                                                                                                                                                                                                                                                                                                                                                                                                                                                                                                                                                                                                                  |
| Article Type:                   | Original research                                                                                                                                                                                                                                                                                                                                                                                                                                                                                                                                                                                                                                                                                       |
| Date Submitted by the Author:   | 09-Nov-2020                                                                                                                                                                                                                                                                                                                                                                                                                                                                                                                                                                                                                                                                                             |
| Complete List of Authors:       | Marlow, Laura; King's College London, Cancer Prevention Group, School of Cancer and Pharmaceutical Sciences; University College London, Research Department of Behavioural Science and Health<br>Forster, Alice; UCL, Research Department of Behavioural Science and Health<br>McBride, Emily; University College London, Health Behaviour Research Centre<br>Rockliffe, Lauren; The University of Manchester, School of Health Sciences, Faculty of Biology, Medicine and Health<br>Kitchener, Henry; University of Manchester<br>Waller, Jo; King's College London, Cancer Prevention Group, School of Cancer and Pharmaceutical Sciences; UCL, Research Department of Behavioural Science and Health |
| <b>Primary Subject Heading</b>: | Public health                                                                                                                                                                                                                                                                                                                                                                                                                                                                                                                                                                                                                                                                                           |
| Secondary Subject Heading:      | Qualitative research                                                                                                                                                                                                                                                                                                                                                                                                                                                                                                                                                                                                                                                                                    |
| Keywords:                       | Public health < INFECTIOUS DISEASES, PREVENTIVE MEDICINE, PRIMARY CARE, QUALITATIVE RESEARCH                                                                                                                                                                                                                                                                                                                                                                                                                                                                                                                                                                                                            |
|                                 |                                                                                                                                                                                                                                                                                                                                                                                                                                                                                                                                                                                                                                                                                                         |

SCHOLARONE™  
Manuscripts



I, the Submitting Author has the right to grant and does grant on behalf of all authors of the Work (as defined in the below author licence), an exclusive licence and/or a non-exclusive licence for contributions from authors who are: i) UK Crown employees; ii) where BMJ has agreed a CC-BY licence shall apply, and/or iii) in accordance with the terms applicable for US Federal Government officers or employees acting as part of their official duties; on a worldwide, perpetual, irrevocable, royalty-free basis to BMJ Publishing Group Ltd ("BMJ") its licensees and where the relevant Journal is co-owned by BMJ to the co-owners of the Journal, to publish the Work in this journal and any other BMJ products and to exploit all rights, as set out in our [licence](#).

The Submitting Author accepts and understands that any supply made under these terms is made by BMJ to the Submitting Author unless you are acting as an employee on behalf of your employer or a postgraduate student of an affiliated institution which is paying any applicable article publishing charge ("APC") for Open Access articles. Where the Submitting Author wishes to make the Work available on an Open Access basis (and intends to pay the relevant APC), the terms of reuse of such Open Access shall be governed by a Creative Commons licence – details of these licences and which [Creative Commons](#) licence will apply to this Work are set out in our licence referred to above.

Other than as permitted in any relevant BMJ Author's Self Archiving Policies, I confirm this Work has not been accepted for publication elsewhere, is not being considered for publication elsewhere and does not duplicate material already published. I confirm all authors consent to publication of this Work and authorise the granting of this licence.

1  
2  
3 **Information needs among women taking part in primary HPV screening in England: A content**  
4 **Analysis**  
5

6 Running title: HPV information needs  
7

8 Laura A.V Marlow (corresponding author)<sup>1,2\*</sup>  
9

10 <sup>1</sup> School of Cancer & Pharmaceutical Sciences, Faculty of Life Sciences & Medicine, King's College  
11 London

12 <sup>2</sup> Department of Behavioural Science and Health, UCL  
13

14 Alice S Forster<sup>2</sup>

15 <sup>2</sup> Department of Behavioural Science and Health, UCL  
16

17 Emily McBride<sup>2</sup>

18 <sup>2</sup> Department of Behavioural Science and Health, UCL  
19

20 Lauren Rockliffe<sup>2</sup>

21 <sup>3</sup> School of Health Sciences, Faculty of Biology, Medicine and Health, University of Manchester  
22

23 <sup>2</sup> Department of Behavioural Science and Health, UCL  
24

25 Henry Kitchener

26 <sup>4</sup> Institute of Cancer Science, University of Manchester  
27

28 Jo Waller<sup>1,2</sup>  
29

30 <sup>1</sup> School of Cancer & Pharmaceutical Sciences, Faculty of Life Sciences & Medicine, King's College  
31 London

32 <sup>2</sup> Department of Behavioural Science and Health, UCL  
33

34 \* corresponding author at:

35 Address: Room GH0603334, 3<sup>rd</sup> Floor, Research Oncology, Bermondsey Wing, Guy's Hospital, Great  
36 Maze Pond, London SE1 9RT, UK

37 Email: l.marlow@kcl.ac.uk

38 Phone: 020 78484675  
39  
40  
41  
42  
43  
44  
45  
46  
47  
48  
49  
50  
51  
52  
53  
54  
55  
56  
57  
58  
59  
60

## Abstract

Objectives: Introducing primary HPV testing to cervical screening programmes means changes to the results women receive. We explored additional information needs among women undergoing HPV primary screening.

Design: Women were sent a postal questionnaire shortly after receiving their results and 6 and 12 months later. Each questionnaire asked if women had any unanswered questions about cervical screening or HPV testing. Free-text responses constituted the data. Themes were identified using Content Analysis.

Setting: NHS Cervical Screening Programme, England

Participants: 381 women who recorded one or more free-text responses.

Results: The most common theme represented women's emotional responses and attempts to understand their results. This theme was raised by 45% of women overall, but was as high as 59% in the HPV cleared group. General questions about the cause and epidemiology of HPV were raised by 38% of women and were more common among those testing HPV Positive with normal cytology (52%). Questions about the purpose and procedure for HPV testing were most common among HPV-negative women (40%, compared to 16%-25% of the other results groups). Questions about future implications of test results, were raised by 20% of women, and this theme was most common among those with persistent HPV.

Conclusions: Despite provision of information alongside screening invitations, women can still have unanswered questions following receipt of their results. Details about the epidemiology of HPV and why cervical screening procedures are changing should be included with screening invitations. Some results groups may benefit from additional tailored information with their result letter.

### Strengths and limitations of this study

- The study benefits from the inclusion of participants who had been tested for HPV as part of routine HPV primary cervical screening
- Participants had a range of HPV and cytology screening results which allowed us to compare information needs between results groups,
- Two thirds of women did not leave a free-text response.
- Questionnaires were completed at least two weeks after receiving results so women participants may already have sought additional information.
- Those with less education were less likely to leave a free-text comment.



## Keywords

cervical screening, HPV testing, information, informed choice, concerns, misunderstanding

## Introduction

Cervical screening programmes have traditionally involved looking for abnormal cytology but HPV primary screening can provide many benefits [1] and has already replaced cytology-based cervical screening in England, Australia, the Netherlands and Wales, and several other countries are expected to follow in the coming years [2,3]. HPV testing looks for presence of the HPV virus. Where HPV is found the sample is looked at for cytology. Women with HPV positive/abnormal cytology results are referred for colposcopy, women with HPV positive/normal cytology are recalled 12 months later. Based on a large pilot study in England, around 13% of women aged 25-64 years will be told they are HPV positive [4,5], compared with ~6% who currently receive an abnormal cytology result (with or without HPV). These figures are expected to decrease somewhat as cohorts offered HPV vaccination move into the programme [6]. Nevertheless, many women will be receiving an HPV positive result, warranting careful consideration of how these results are communicated.

Of particular concern is that some women will be learning about the link between cervical cancer and a sexually transmitted infection (STI) for the first time, which may come as a shock and could raise concerns about sexual relationships [7-9]. In a review of studies exploring understanding of HPV and information needs [10], women found it difficult to incorporate new information about HPV testing into their pre-existing understanding of cervical screening and often sought additional information after being told they were HPV-positive. The review identified uncertainty about HPV transmission, prevention, symptoms, risk factors (for HPV and cervical cancer), whether HPV could cause other cancers, treatment, fertility and the natural history of the virus. However, most of the studies included were small qualitative studies carried out before 2007, half of which used samples of women who had not actually been tested for HPV. More recently, qualitative interviews with women who were told they were HPV positive in an HPV self-sampling trial, identified some key themes: intense affect (feelings and emotions) after receiving positive results, importance of discussing results with a provider, information seeking, confusion about purpose and meaning of HPV versus Pap tests [11].

Establishing women's information needs in the context of primary screening is vital to inform patient education and communication strategies. Clear information provided at the appropriate time-point (e.g. alongside results) may help to minimise the adverse psychological responses to HPV-positive results that have been identified [12]. The aims of this study were to i) identify the information needs of women participating in primary HPV screening and ii) to explore how these might vary

1  
2  
3 according to women's HPV and cytology results. This study is part of a broader psychological  
4 evaluation of HPV primary testing in England [13].  
5

## 6 7 **Methods**

### 8 9 *Participants*

10 Participants were women aged 24-65 years who attended for cervical screening in England in one of  
11 five sites piloting HPV primary testing (between 2016 and 2017). Women testing HPV negative were  
12 invited for routine recall, whereas those testing positive had reflexive cytology and were managed  
13 accordingly (see Supplementary file 1 for a flow diagram and additional contextual information  
14 about cervical screening in England). Recruitment was stratified to ensure data were collected from  
15 women receiving different screening results (see Supplementary Figure 2): i) negative for HPV, ii)  
16 HPV-positive with normal cytology and iii) HPV-positive with abnormal cytology.  
17  
18

19 We also recruited two groups of women who had initially tested positive for HPV with normal  
20 cytology, and who had re-attended at 12-month follow-up and either iv) had persistent HPV i.e. they  
21 were still HPV-positive with normal cytology or v) had cleared the infection i.e. they now tested HPV  
22 negative. A group of women undergoing conventional cytology screening were also recruited but we  
23 have excluded their data from the present analyses.  
24  
25

### 26 27 *Procedure*

28 The data reported here were collected from cross-sectional surveys sent to women at three time  
29 points: shortly after receiving their results (baseline), 6-months, and 12-months. The full protocol is  
30 available elsewhere [13], but in brief women were contacted by post within two weeks of receiving  
31 their screening result letter and invited to complete and return a consent form and questionnaire.  
32 Women who returned the questionnaire were also sent questionnaires 6 and 12 months later. The  
33 primary outcome measures assessed in the questionnaire were anxiety and general distress [12].  
34 Health Research Authority (HRA) approval was granted on 26/09/2016 (Research Ethics Committee  
35 reference: 16/LO/0902 and Confidentiality Advisory Group reference: 16/CAG/0047).  
36  
37

### 38 39 *Patient and Public Involvement*

40 Neither patients nor the public were involved in the design, conduct, analysis or interpretation of  
41 this study.  
42  
43

### 44 45 *Measures*

46 At each of the three time-points, women were asked "Do you have any unanswered questions about  
47 cervical screening or HPV testing?" and space for an open response was provided. Free-text  
48 responses to this question constituted the primary data for analyses. At the end of the baseline  
49  
50  
51  
52  
53  
54  
55  
56  
57  
58  
59  
60

1  
2  
3 questionnaire there was also a space provided for “any other comments”. Free-text responses  
4 recorded here were also included where they were relevant to the aims of this analysis (irrelevant  
5 comments were excluded, for example comments about practical aspects of the survey study).  
6  
7 Socio-demographic information including age, marital status, education and ethnicity were also  
8 collected. Information on women’s screening results was collected directly from the screening  
9 laboratories.  
10  
11  
12

### 13 *Analysis*

14 Content analysis was used to explore women’s free-text responses. Responses from all three time  
15 points were analysed together. Content analysis can be defined as “subjective interpretation of the  
16 content of text data through the systematic classification process of coding and identifying themes”  
17 [14]. Responses were typed into an excel spreadsheet and two authors (LR and EM) immersed  
18 themselves in the baseline data. An initial coding frame was developed using an inductive,  
19 conventional content analysis approach (i.e. avoiding preconceived categories) [15]. Three senior  
20 members of the research team then coded the data for 20% of the baseline participants (n=60),  
21 before refining the coding frame. All responses (from each time point) were then independently  
22 double coded. Any discrepancies were discussed. Multiple codes were allocated to individual  
23 responses when appropriate. We used 2-by-5 chi-square tests to explore differences in the  
24 proportion of women citing each major theme by result group. Sub-themes are reported  
25 descriptively.  
26  
27  
28  
29  
30  
31  
32  
33  
34  
35

### 36 **Results**

37 Overall 921 women who had undergone HPV primary screening returned their baseline  
38 questionnaire (see Figure 2). A total of 507 free-text responses were recorded (baseline=329/921, 6  
39 months=110/762 and 12 months =68/537). Women testing HPV-positive with normal cytology and  
40 those with persistent HPV were most likely to leave a free-text response (50%); HPV-negative  
41 women were least likely (26%) to do so. Free-text responses were also more common among  
42 women in the youngest age group and those with a degree qualification (see Table 1 for sample  
43 characteristics). We have described each theme below with the prevalence of themes reported in  
44 Table 2 (overall and by results group). Illustrative examples of women’s comments are presented in  
45 Table 3.  
46  
47  
48  
49  
50  
51  
52  
53

#### 54 *Reaction to and understanding of results*

55 Across all results groups (except HPV-negative), the most common theme was ‘reaction to and  
56 understanding of results’. This theme was most frequently present in comments made by HPV  
57 positive women (with normal or abnormal cytology, 51% and 54% respectively) and by women who  
58  
59  
60

1  
2  
3 had cleared HPV at 12-months (59%). Women expressed a wide range of emotional responses to  
4 their results including shock, worry and relief. Comments included questions about the exact  
5 meaning of their result, including clarification about which HPV type they had. Implications for  
6 sexual relationships were raised by a number of women, including requests for clarification of what  
7 their result meant for future sexual relationships, concern about re-infection within a relationship  
8 and the possible consequences of infection for their partner. A lack of confidence in HPV results and  
9 requests for cytology were recorded by 5% of women (12% of women who were HPV negative and  
10 21% had cleared HPV). Having previously experienced an abnormal result or approaching the end of  
11 cervical screening eligibility were reasons that women gave for concern about not having a cytology  
12 test.

### 20 *Questions about HPV and cervical cancer*

21  
22 Over a third of women who left a comment recorded a question about HPV (38%) and this was more  
23 common among women who were HPV-positive with normal cytology (52%) or who had persistent  
24 HPV (41%). Women asked about various aspects of HPV epidemiology including questions about the  
25 timeline of infection, latency and clearance. Women's questions about HPV also included requests  
26 for clarification about the cause of their HPV, frequently including references to their long-term or  
27 sexual relationships. The potential for preventing future HPV infections and treating current ones  
28 was also raised. Some women expressed a more general lack of understanding about HPV, saying  
29 they had never heard of it or did not know what it was.

30  
31 A smaller number of women provided comments about cervical cancer (14% across all results  
32 groups). A range of general questions were raised about the risk of developing cervical cancer. Some  
33 women also asked about other specific causal risk factors for cervical cancer (e.g. polycystic ovary  
34 syndrome, contraceptive implants, previous cancer diagnosis or treatment).

### 43 *Purpose and procedure for HPV testing*

44  
45 'Purpose and procedure for HPV testing' was the most common theme for HPV-negative women  
46 (40%) but was also raised by HPV-positive women (16-24%) and women who had cleared HPV (24%).  
47 Questions about the purpose of HPV testing were predominantly to clarify how HPV testing fit with  
48 their existing knowledge of cervical screening, but some women mentioned being unaware they had  
49 been tested for HPV until they received their results. Some HPV-negative women wanted to clarify  
50 whether their sample had been cytology tested or why cytology was not also performed.

51  
52 Women also made comments about the timing of tests, particularly in relation to repeat HPV  
53 testing. They wanted to be reassured that the recommended intervals were 'soon enough' or  
54 'adequate'. Several women also commented on the delivery of their results, for example saying that  
55  
56  
57  
58  
59  
60

1  
2  
3 the results had not been clear from the letter they received and that further discussion with their GP  
4 had been needed.  
5

#### 6 7 *Future implications of test results* 8

9 The theme 'Future implications of the results' was identified in 19% of the comments and was most  
10 commonly recorded for women with persistent HPV (30%). These comments related specifically to  
11 clinical management, with requests for clarification about what would happen next for them.  
12 Implications for fertility, for their partners being tested and advice on clearing HPV was mentioned  
13 by a few women.  
14  
15  
16  
17  
18  
19

#### 20 21 *Information seeking and (di)satisfaction* 22

23 Some women described their experiences of seeking additional information about HPV. This  
24 predominantly included experiences of searching online or contacting their GP surgery to discuss  
25 their result further (with a GP or nurse) and was recorded for 22% of those leaving a comment. A  
26 number of women indicated satisfaction, or more commonly lack of satisfaction, with the  
27 information they had received.  
28  
29

#### 30 31 **Discussion** 32

33 This study found women undergoing primary HPV testing for cervical screening can have additional  
34 information needs after receiving their results. Requests for more information about the  
35 epidemiology and cause of HPV were common across all results groups, so this seems to be  
36 important information to communicate to women taking part in screening. Other questions were  
37 more common among women receiving particular results; for example women receiving an HPV  
38 positive result (with normal cytology) often had questions about the meaning of this result and  
39 wanted advice about the implications for sexual relationships. Women with abnormal cytology  
40 seemed to have fewer questions about HPV and the meaning of their result. This may in part be  
41 because they had been referred for colposcopy and even if they had not yet attended and had the  
42 opportunity to ask questions, they would have received an additional information leaflet with their  
43 results letter. They did, however, express more worry and concern. These differences suggest there  
44 may be merit in including results-tailored information alongside the delivery of results. However,  
45 the wide range of themes identified and the personalised nature of many questions means  
46 signposting to additional information will also be important.  
47  
48  
49  
50  
51  
52  
53  
54  
55

56  
57 Some of our themes relating to women's understanding of HPV and cervical cancer were similar to  
58 other studies [9,10], supporting the need to provide women with information about the cause and  
59  
60

1  
2  
3 epidemiology of HPV. Women's desire to develop a coherent model of what HPV is, the timeline of  
4 infection and its cause and consequences is supported by theoretical models of illness  
5 representation which suggest that these aspects are important for understanding HPV and cervical  
6 cancer and consequently for coping with being given an HPV-positive result [16,17].  
7  
8  
9

10 Previous studies have suggested that women are often shocked to learn about the sexually  
11 transmitted nature of HPV [7,8]. Implications for sexual relationships was not the most common  
12 theme identified and while this question was raised by some women (particularly those who test  
13 HPV-positive with normal cytology), it is reassuring that this was not more widespread in women's  
14 responses. Some themes such as the impact of HPV on fertility or questions about the impact for  
15 male partners, were raised by very few women suggesting these are unlikely to be major areas of  
16 concern. Studies exploring the psychological impact of testing HPV positive in the context of  
17 organised screening show no differences in distress across result groups, but anxiety can be slightly  
18 higher in HPV positive women, at least in the short term [e.g. 12, 18].  
19  
20  
21  
22  
23  
24  
25

26 The main strength of this study is that we included women who had been tested for HPV as part of  
27 routine cervical screening, meaning we were able to compare responses across results groups.  
28 However, there are some limitations. The overall response rate for the questionnaire was low and of  
29 those responding, less than half recorded a free-text response. We cannot be sure if women who  
30 chose not to leave a free-text response had no information needs or just did not state them. In  
31 addition, since the questionnaires were completed at least two weeks after receiving results, women  
32 may already have sought answers to any questions they initially had. It is therefore likely that our  
33 study underestimates the number of questions women have upon receiving their result. Women  
34 from lower socio-economic backgrounds were less likely to return the questionnaire [12] and those  
35 with less education were less likely to leave a free-text comment. It is therefore possible that the  
36 results under-represent the concerns of women from lower socio-economic backgrounds. Future  
37 research on HPV information needs should focus on these harder to reach groups.  
38  
39  
40  
41  
42  
43  
44  
45

46 A number of implications arise from this study. Firstly, it is important that women are made aware of  
47 HPV before being tested. For some women, including information about HPV in invitation letters will  
48 not be sufficient so sample-takers have an important role in ensuring women know they are having  
49 an HPV test. In some instances, this may be simply by drawing their attention to the information  
50 leaflet that they receive with their screening invitation, but for some women this will lead to  
51 additional questions which sample-takers should be prepared to answer.  
52  
53  
54  
55  
56

57 Secondly, information provided to women alongside their results should ideally be tailored to the  
58 result being communicated. Many of the women who were HPV-positive or had recently cleared  
59  
60

1  
2  
3 HPV had questions about the meaning of their result and some described contacting their GP  
4 surgery to discuss this. This is consistent with findings in the US, where women receiving HPV  
5 positive results felt a sense of urgency to discuss it with their Health care provider and felt reassured  
6 after this had happened [11]. It is important that staff in primary care are well equipped to answer  
7 women's questions or to direct them to the best source of information. This may involve answering  
8 questions about HPV themselves or directing women to online information materials (e.g. the NHS  
9 screening website). In particular, the information needs recorded by women were frequently  
10 interlinked with their personal information and medical history, reflecting attempts to make sense of  
11 their results. There are likely to be women who want to discuss their specific results and this might  
12 also include how their risk relates to their past screening history or other health conditions. For  
13 these women, knowing who they can contact (e.g. a specific helpline, a cancer charity helpline, their  
14 GP) will be important.

15  
16 Finally, for some women there was confusion about why changes were being made to the screening  
17 programme and concern about the fact that their sample had not been checked for abnormal cells.  
18 It is important to explain why screening is changing and to reassure women that HPV testing is  
19 better than cytology, with the changes being made to improve the screening programme. It might  
20 also be useful to clarify specifically that this is safe even for women who are at the end of screening  
21 (mentioned by some women in their 60s) or those who have previously had abnormal cytology  
22 results. The recent public backlash following changes to the cervical screening programme in  
23 Australia has highlighted the importance of explaining the rationale behind and safety of changes  
24 being made in public health [19].

25  
26 Women taking part in HPV-based cervical screening continue to have additional information needs.  
27 Information about the epidemiology of HPV, why the cervical screening procedure is changing and  
28 the meaning and implications of different results, should be provided in materials accompanying  
29 results. Tailored information and signposting to additional materials and resources would also help  
30 to ensure women can find the information they need

### 31 32 33 34 35 36 37 38 39 40 41 42 43 44 45 46 47 48 49 50 51 **Contributorship Statement**

52 JW, LM, AF and HK conceived the study. JW, LM, EM and AF developed the measures. EM, JW and LR  
53 managed the project. All authors contributed to the analyses. LM drafted the paper. All authors  
54 contributed to the final version of the manuscript. We would like to thank all the laboratory staff  
55 who made recruiting for the psychological evaluation possible, as well as Kirsty Bennett and Fatima  
56  
57  
58  
59  
60

1  
2  
3 Osmani who contributed to recruitment and data entry. We also thank Julieta Patnick for her helpful  
4 comments.  
5

### 6 7 **Competing interests**

8 The authors declare no conflict of interest.  
9

### 10 11 **Funding**

12 Our study was funded by Public Health England (PHE). No grant number was given. PHE funded Emily  
13 McBride from 03/01/2016 until 30/09/2017. EM was funded by the National Institute for Health  
14 Research (NIHR) from 01/10/2017 [grant number DRF-2017-10-105]; the views expressed in this  
15 article are not necessarily those of the NHS, the NIHR or the Department of Health and Social Care.  
16 JW, LM and AF are funded by Cancer Research UK (grant numbers C7492/A17219 and  
17 C49896/A17429).  
18  
19  
20  
21  
22

### 23 24 **Data sharing statement**

25 Data is available from the corresponding author upon reasonable request.  
26  
27  
28

### 29 30 **References**

- 31 [1] Schiffman M, Wentzensen N, Wacholder S, Kinney W, Gage JC, Castle PE. Human  
32 papillomavirus testing in the prevention of cervical cancer. *J Natl Cancer Inst* 2011;103:368-83.  
33 [2] Wentzensen N, Arbyn M, Berkhof J, Bower M, Canfell K, Einstein M et al. Eurogin 2016  
34 Roadmap: how HPV knowledge is changing screening practice. *Int J Cancer* 2017;140:2192-200.  
35 [3] Cuschieri K, Ronco G, Lorincz A, Smith L, Ogilvie G, Mirabello L et al. Eurogin roadmap 2017:  
36 Triage strategies for the management of HPV-positive women in cervical screening programs. *Int J*  
37 *Cancer* 2018;143:735-45.  
38 [4] Kitchener HC, Almonte M, Gilham C, Dowie R, Stoykova B, Sargent A et al. ARTISTIC: a  
39 randomised trial of human papillomavirus (HPV) testing in primary cervical screening. *Health Technol*  
40 *Assess* 2009;13:1-150, iii-iv.  
41 [5] Rebolj M, Rimmer J, Denton K, Tidy J, Mathews C, Ellis K et al. Primary cervical screening  
42 with highrisk human papillomavirus testing: observational study. *BMJ* 2019;364:l240.  
43 [6] Brotherton JM, Hawkes D, Sultana F, Malloy MJ, Machalek DA, Smith MA et al. Age-specific  
44 HPV prevalence among 116,052 women in Australia's renewed cervical screening program: A new  
45 tool for monitoring vaccine impact. *Vaccine* 2019;37(3):412-416.  
46 [7] Waller J, McCaffery K, Nazroo J, Wardle J. Making sense of information about HPV in cervical  
47 screening: a qualitative study. *Br J Cancer* 2005;92:265-70.  
48  
49  
50  
51  
52  
53  
54  
55  
56  
57  
58  
59  
60



- 1  
2  
3 [8] McCaffery K, Forrest S, Waller J, Desai M, Szarewski A, Wardle J. Attitudes towards HPV  
4 testing: a qualitative study of beliefs among Indian, Pakistani, African-Caribbean and white British  
5 women in the UK. *Br J Cancer* 2003;88:42-6.  
6  
7  
8 [9] Patel H, Moss EL, Sherman SM. HPV primary cervical screening in England: Women's  
9 awareness and attitudes. *Psychooncology* 2018;27:1559-64.  
10  
11 [10] Hendry M, Pasterfield D, Lewis R, Clements A, Damery S, Neal RD et al. Are women ready for  
12 the new cervical screening protocol in England? A systematic review and qualitative synthesis of  
13 views about human papillomavirus testing. *Br J Cancer* 2012;107:243-54.  
14  
15 [11] Tiro JA, Betts AC, Kimbel K, et al. (2019) Understanding Patients' Perspectives and  
16 Information Needs Following a Positive Home Human Papillomavirus Self-Sampling Kit Result. *J*  
17 *Womens Health (Larchmt) (United States)*, 28(3) p384-392  
18  
19 [12] McBride E, Marlow LAV, Forster AS, Ridout D, Kitchener H, Patnick J et al. Anxiety and  
20 distress following receipt of results from routine HPV primary testing in cervical screening: The  
21 psychological impact of primary screening (PIPS) study. *Int J Cancer* 2020;146(8):2113-2121.  
22  
23 [13] McBride E, Marlow L, Forster AS, Moss S, Myles J, Kitchener H et al. Psychological Impact of  
24 Primary Screening (PIPS) for HPV: a protocol for a cross-sectional evaluation within the NHS cervical  
25 screening programme. *BMJ Open* 2016;6:e014356.  
26  
27 [14] Hsieh HF, Shannon SE. Three approaches to qualitative content analysis. *Qual Health Res*  
28 2005;15:1277-88.  
29  
30 [15] Kondracki NL, Wellman NS, Amundson DR. Content analysis: review of methods and their  
31 applications in nutrition education. *J Nutr Educ Behav* 2002;34:224-30.  
32  
33 [16] Leventhal H, Meyer D, Nerenz D. The common sense representation of illness danger. In:  
34 Rachman S, ed. *Contributions to Medical Psychology*. New York: Pergamon Press 1980:7-30.  
35  
36 [17] Marlow LA, Wardle J, Grant N, Waller J. Human papillomavirus (HPV) information needs: a  
37 theoreticl framework. *J Fam Plann Reprod Health Care* 2009;35:29-33.  
38  
39 [18] Andreassen T, Hansen BT, Engesaeter B, Hashim D, Støer NC, Tropé A et al. Psychological  
40 effect of cervical cancer screening when changing primary screening method from cytology to high-  
41 risk human papilloma virus testing. *Int J Cancer* 2019;145(1):29-39.  
42  
43 [19] Smith M, Hammond I, Saville M. Lessons from the renewal of the National Cervical Screening  
44 Program in Australia. *Public Health Res Pract* 2019;29:2921914  
45  
46  
47  
48  
49  
50  
51  
52  
53  
54  
55  
56  
57  
58  
59  
60

**Table 1: Sample characteristics of women participating in HPV primary testing who did and did not record a free-text response during the course of the study (n=921)**

|                                 | Free-text response recorded at any time |       | No free-text response recorded |       | $\chi^2$ (df), p-value    |
|---------------------------------|-----------------------------------------|-------|--------------------------------|-------|---------------------------|
|                                 | N                                       | Row % | n                              | Row % |                           |
| Overall                         | 381                                     | 41.4  | 540                            | 58.6  |                           |
| Result group                    |                                         |       |                                |       |                           |
| HPV negative                    | 65                                      | 26.2  | 183                            | 73.8  | $\chi^2(4)=38.49, p<.001$ |
| HPV positive, cytology normal   | 126                                     | 50.0  | 129                            | 50.0  |                           |
| HPV positive, cytology abnormal | 67                                      | 39.4  | 103                            | 60.6  |                           |
| Persistent HPV                  | 91                                      | 50.8  | 88                             | 49.2  |                           |
| Cleared HPV                     | 29                                      | 43.9  | 37                             | 56.1  |                           |
| Age                             |                                         |       |                                |       |                           |
| 24-34                           | 171                                     | 46.7  | 195                            | 53.3  | $\chi^2(3)=10.63, p=.014$ |
| 35-44                           | 66                                      | 32.7  | 136                            | 67.3  |                           |
| 45-54                           | 80                                      | 41.0  | 115                            | 59.0  |                           |
| 55-65                           | 64                                      | 41.0  | 92                             | 59.0  |                           |
| Marital status*                 |                                         |       |                                |       |                           |
| Current partner                 | 281                                     | 40.7  | 410                            | 59.3  | $\chi^2(1)=.79, p=.375$   |
| No partner                      | 95                                      | 44.4  | 119                            | 55.6  |                           |
| Education**                     |                                         |       |                                |       |                           |
| Degree or higher                | 189                                     | 48.8  | 198                            | 51.2  | $\chi^2(2)=14.62, p=.001$ |
| Qualifications below degree     | 177                                     | 36.0  | 314                            | 64.0  |                           |
| No formal qualifications        | 7                                       | 38.9  | 11                             | 61.1  |                           |
| Ethnicity                       |                                         |       |                                |       |                           |
| White (British or other)        | 356                                     | 42.7  | 527                            | 57.3  | $\chi^2(1)=4.77, p=.029$  |
| Other ethnicity***              | 20                                      | 28.6  | 50                             | 71.4  |                           |

\*Marital status: current partner (married, civil partnership, living with partner, in a relationship) and no partner (single, divorced, widowed). \*\*No formal qualifications included those with no qualifications and those who were still studying with no previous qualifications. \*\*\*Other ethnicity includes: Asian/Asian British, Black/African/Caribbean/Black British, Mixed/Multiple ethnic groups, other ethnic group.

NOTE: Where n does not add up to n=921, this is due to missing data

**Table 2: Number of women mentioning each major and sub-theme overall and by test result group**

|                                                 | Overall<br>(n=381) | HPV<br>negative<br>(n=65) | HPV<br>positive,<br>cytology<br>normal<br>(n=129) | HPV<br>positive,<br>cytology<br>abnormal<br>(n=67) | Persistent<br>HPV<br>(n=91) | Cleared<br>HPV<br>(n=29) | $\chi^2$ (df),<br>p-value   |
|-------------------------------------------------|--------------------|---------------------------|---------------------------------------------------|----------------------------------------------------|-----------------------------|--------------------------|-----------------------------|
|                                                 | n (%)              | n (%)                     | n (%)                                             | n (%)                                              | n (%)                       | n (%)                    |                             |
| <b>Reaction to and understanding of results</b> | <b>170 (45)</b>    | <b>11 (17)</b>            | <b>69 (54)</b>                                    | <b>34 (51)</b>                                     | <b>39 (43)</b>              | <b>17 (59)</b>           | $\chi^2(4)=27.72,$<br>.001  |
| Emotional response                              | 85 (22)            | 5 (8)                     | 28 (22)                                           | 24 (36)                                            | 18 (20)                     | 10 (35)                  |                             |
| Meaning of results                              | 72 (19)            | 1 (2)                     | 35 (27)                                           | 11 (16)                                            | 21 (23)                     | 4 (14)                   |                             |
| Impact on sexual relationships                  | 41 (11)            | 0                         | 25 (19)                                           | 4 (6)                                              | 11 (12)                     | 1 (3)                    |                             |
| Confidence in results                           | 20 (5)             | 8 (12)                    | 4 (3)                                             | 1 (2)                                              | 1 (1)                       | 6 (21)                   |                             |
| <b>Questions about HPV</b>                      | <b>143 (38)</b>    | <b>8 (12)</b>             | <b>67 (52)</b>                                    | <b>20 (30)</b>                                     | <b>37 (41)</b>              | <b>11 (38)</b>           | $\chi^2(4)=31.13,$<br><.001 |
| General lack of understanding                   | 24 (7)             | 2 (3)                     | 15 (12)                                           | 6 (9)                                              | 4 (4)                       | 0                        |                             |
| Epidemiology of HPV                             | 63 (17)            | 2 (3)                     | 30 (23)                                           | 5 (8)                                              | 20 (22)                     | 6 (21)                   |                             |
| Cause of HPV                                    | 32 (8)             | 1 (2)                     | 20 (16)                                           | 3 (5)                                              | 6 (7)                       | 2 (7)                    |                             |
| Prevention/Treatment of HPV                     | 28 (7)             | 0                         | 11 (9)                                            | 7 (10)                                             | 9 (10)                      | 1 (3)                    |                             |
| HPV vaccination                                 | 39 (10)            | 3 (5)                     | 20 (16)                                           | 2 (3)                                              | 11 (12)                     | 3 (10)                   |                             |
| <b>Questions about cervical cancer</b>          | <b>52 (14)</b>     | <b>5 (8)</b>              | <b>24 (19)</b>                                    | <b>7 (10)</b>                                      | <b>14 (15)</b>              | <b>2 (7)</b>             | $\chi^2(4)=6.58,$<br>.160   |
| Risk of cervical cancer                         | 45 (12)            | 3 (3)                     | 20 (16)                                           | 7 (10)                                             | 14 (15)                     | 2 (7)                    |                             |
| Other cervical cancer risk factors              | 14 (4)             | 3 (5)                     | 7 (5)                                             | 1 (2)                                              | 2 (2)                       | 1 (3)                    |                             |
| <b>Purpose and procedure for HPV testing</b>    | <b>85 (22)</b>     | <b>26 (40)</b>            | <b>20 (16)</b>                                    | <b>16 (24)</b>                                     | <b>16 (18)</b>              | <b>7 (24)</b>            | $\chi^2(4)=16.51,$<br>.002  |
| Purpose                                         | 22 (6)             | 11 (17)                   | 5 (4)                                             | 4 (6)                                              | 2 (2)                       | 0                        |                             |
| Procedure                                       | 18 (5)             | 10 (15)                   | 3 (2)                                             | 1 (2)                                              | 0                           | 4 (14)                   |                             |
| Timing                                          | 36 (9)             | 4 (6)                     | 12 (9)                                            | 5 (8)                                              | 11 (12)                     | 4 (14)                   |                             |
| Delivery of results                             | 15 (4)             | 4 (6)                     | 1 (1)                                             | 7 (10)                                             | 3 (3)                       | 0                        |                             |
| <b>Future implications of test results</b>      | <b>73 (19)</b>     | <b>1 (2)</b>              | <b>30 (23)</b>                                    | <b>10 (15)</b>                                     | <b>27 (30)</b>              | <b>5 (17)</b>            | $\chi^2(4)=21.76,$<br><.001 |
| Clinical management                             | 39 (10)            | 1(2)                      | 14(11)                                            | 4 (6)                                              | 19 (21)                     | 1 (4)                    |                             |
| Fertility/sexual health                         | 13 (3)             | 0                         | 5 (4)                                             | 1 (3)                                              | 3 (3)                       | 3 (10)                   |                             |
| Advice on clearing HPV                          | 18 (5)             | 0                         | 10 (8)                                            | 2 (3)                                              | 5 (6)                       | 1 (3)                    |                             |
| Testing for partners                            | 7 (2)              | 0                         | 4 (3)                                             | 2 (3)                                              | 1 (1)                       | 0                        |                             |
| <b>Information seeking/(di)satisfaction</b>     | <b>85 (22)</b>     | <b>8 (12)</b>             | <b>37 (29)</b>                                    | <b>14 (21)</b>                                     | <b>22 (24)</b>              | <b>4 (14)</b>            | $\chi^2(4)=8.25,$<br>.083   |
| Information seeking                             | 30 (8)             | 3 (5)                     | 15 (12)                                           | 7 (10)                                             | 5 (6)                       | 0                        |                             |
| (Di)satisfaction                                | 73 (19)            | 6 (9)                     | 31 (24)                                           | 12 (18)                                            | 20 (22)                     | 4 (14)                   |                             |

**Table 3: Examples of each quote**

| Reaction to and understanding of results |                                                                                                                                                                                                                                                                                                                                                                                                                                                                                                                        |
|------------------------------------------|------------------------------------------------------------------------------------------------------------------------------------------------------------------------------------------------------------------------------------------------------------------------------------------------------------------------------------------------------------------------------------------------------------------------------------------------------------------------------------------------------------------------|
| Emotional response                       | <p><i>"I am very worried in case I end up with cervical cancer"</i> [HPV+, cyto norm; 55-65 years]</p> <p><i>"I feel quite distressed about the results and the letter ... has caused me stress and anxiety"</i> [HPV+, cyto abnorm; 24-34 years]</p> <p><i>"I was advised I do not have HPV, I have had this persistently for years, I am so relieved"</i> [HPV cleared; 24-34 years]</p>                                                                                                                             |
| Confidence in results                    | <p><i>"I have a family history of abnormal cells being found, but I was not tested for anything other than HPV. I would like to have a further test to confirm no abnormal cells"</i> [HPV-; 35-44 years]</p> <p><i>"Because I have previously had abnormal cells... I was not reassured by my HPV-negative result"</i> [HPV-; 45-54 years]</p> <p><i>"I am uneasy about the fact that cells have not been checked for abnormality, especially as no further tests will be offered to me"</i> [HPV -; 55-65 years]</p> |
| Meaning of results                       | <p><i>"I was cleared of HPV last year, why has it come back?"</i> [HPV+, cyto norm; 45-54 years]</p> <p><i>"I have had two smears now both HPV-positive. How long can a person be HPV-positive for HPV?"</i> [HPV persistent; 45-54 years]</p> <p><i>"My previous test was positive and this one was negative. Does this mean it is still present but not active?"</i> [HPV cleared; 24-34 years] <i>"I caught genital warts at 23 - is this somehow different?"</i> [HPV+, cyto norm; 24-34 years]</p>                |
| Impact on sexual relationships           | <p><i>"Not sure what this means for future sexual relationships"</i> [HPV+, cyto abnorm; 24-34 years]</p> <p><i>"Can it be perpetuated by continuously being passed from one partner to the other?"</i> [HPV+, cyto norm; 55-65 years]</p> <p><i>"Should I tell sexual partners?"</i> [HPV+, cyto norm; 24-34 years]</p> <p><i>"Initially I worried about what my husband would think"</i> [HPV persistent; 55-65 years]</p> <p><i>"I blame my partner for this"</i> [HPV+, cyto norm; 35-44 years]</p>                |
| Questions about HPV                      |                                                                                                                                                                                                                                                                                                                                                                                                                                                                                                                        |
| General lack of understanding            | <p><i>"I didn't even know I had been tested for HPV. Have never heard of it before"</i> [HPV+, cyto norm; 35-44 years]</p> <p><i>"I don't really understand what HPV is"</i> [HPV+, cyto norm; 24-34 years]</p>                                                                                                                                                                                                                                                                                                        |
| Epidemiology of HPV                      | <p><i>"How long does HPV last? What will happen if it doesn't go away?"</i> [HPV+, cyto norm; 24-34 years]</p> <p><i>"Has it gone and come back again or have I had it for 3 years?"</i> [HPV+, cyto norm; 35-44 years]</p> <p><i>"I'm still unclear as to what makes some peoples CIN1 cells disappear while others develop further"</i> [HPV+, cyto abnorm; 35-44 years]</p> <p><i>"Will it ever go away? Or get worse?"</i> [HPV persistent; 55-65 years]</p>                                                       |
| Cause of HPV                             | <p><i>"I don't understand how I have got HPV"</i> [HPV+, cyto norm; 24-34 years]</p> <p><i>"I have not been sexually active for 6 years and can't understand why I have got it with only having one long-term partner"</i> [HPV+, cyto abnorm; 35-44 years]</p>                                                                                                                                                                                                                                                        |
| Prevention/treatment for HPV             | <p><i>"Should I now always use condoms for sex?"</i> [HPV+, cyto norm; 24-34 years]</p> <p><i>"Is there something I can take to get rid of HPV?"</i> [HPV+, cyto norm; 35-44 years]</p> <p><i>"Are there really no ways to treat the HPV virus?"</i> [HPV persistent; 55-65 years]</p>                                                                                                                                                                                                                                 |

|                                              |                                                                                                                                                                                                                                                                                                                                                                                                                                              |
|----------------------------------------------|----------------------------------------------------------------------------------------------------------------------------------------------------------------------------------------------------------------------------------------------------------------------------------------------------------------------------------------------------------------------------------------------------------------------------------------------|
| HPV vaccination                              | <p><i>"I had the HPV vaccine, why didn't it work?"</i> [HPV+, cyto norm; 24-34 years]</p> <p><i>"I'd like to know if I could be offered the vaccine and whether it would work for me"</i> [HPV+, cyto norm; 35-44 years]</p> <p><i>"I have been considering having the vaccine but unsure of benefits at my age"</i> [HPV cleared; 35-44 years]</p>                                                                                          |
| <b>Questions about cervical cancer</b>       |                                                                                                                                                                                                                                                                                                                                                                                                                                              |
| Risk of cervical cancer                      | <p><i>"What are the chances of this becoming cancerous?"</i> [HPV+, cyto norm; 55-65 years]</p> <p><i>"What proportion of women who have had 2 smears detecting high risk HPV will go on to develop cervical cancer?"</i> [HPV persistent; 45-54 years]</p>                                                                                                                                                                                  |
| Other cervical cancer risk factors           | <p><i>"There is a vast history of cancer in my family. Am I more likely to get cancer?"</i> [HPV+, cyto norm; 55-65 years]</p> <p><i>"I have a contraception implant - does this affect HPV or my chances of developing cervical cancer"</i> [HPV+, cyto norm; 24-34 years]</p>                                                                                                                                                              |
| <b>Purpose and procedure for HPV testing</b> |                                                                                                                                                                                                                                                                                                                                                                                                                                              |
| Purpose                                      | <p><i>"I am not sure if HPV test covers more, less or the same as a normal smear test"</i> [HPV-; 45-54 years]</p> <p><i>"I do not know if one is more thorough and effective than the other"</i> [HPV-; 35-44 years]</p> <p><i>"Was given no information that would be a different test other than smear"</i> [HPV+, cyto norm; 45-54 years]</p>                                                                                            |
| Procedure                                    | <p><i>"Was the HPV an additional test in addition to a normal smear test?"</i> [HPV-; 45-54 years]</p> <p><i>"Why when HPV is not present they don't test the sample"</i> [HPV cleared; 24-34 years]</p>                                                                                                                                                                                                                                     |
| Timing                                       | <p><i>"Why can't I be re-tested in 6 months instead of waiting another year?"</i> [HPV+, cyto norm; 45-54 years]</p> <p><i>"Is having my next smear in 1 year soon enough? Could my cells change quickly enough to be cancerous before then?"</i> [HPV+, cyto norm; 45-54 years]</p> <p><i>"I would like to be reassured that the intervals between tests are adequate to pick up any changes to my body"</i> [HPV cleared; 35-44 years]</p> |
| Delivery of results                          | <p><i>"I haven't received a letter with my results and I don't ever recall receiving results"</i> [HPV-; 35-44 years]</p> <p><i>"I had lots of questions that I could not get answered because results come in letter form"</i> [HPV+, cyto abnorm; 24-34 years]</p>                                                                                                                                                                         |
| <b>Future implications of test results</b>   |                                                                                                                                                                                                                                                                                                                                                                                                                                              |
| Clinical management                          | <p><i>"My test was positive two times and I want to meet a specialist"</i> [HPV+, cyto norm; 45-54 years]</p> <p><i>"I had a second positive HPV and have not been invited for further testing which the nurse said I would be. I am wondering why"</i> [HPV persistent; 55-65 years]</p> <p><i>"Am I now having a colposcopy because I have had HPV for 2 years?"</i> [HPV persistent; 45-54 years]</p>                                     |
| Fertility/sexual health                      | <p><i>"I am due a second test in 1 years time, but I am hopefully aiming to be pregnant around then, is this a major problem?"</i> [HPV+, cyto norm; 24-34 years]</p> <p><i>"Will it increase my chances of miscarriage?"</i> [HPV persistent; 24-34 years]</p>                                                                                                                                                                              |
| Advice on clearing HPV                       | <p><i>"What can I do in the next 12 months to help myself?"</i> [HPV+, cyto norm; 24-34 years]</p> <p><i>"Is there anything I can do to stop HPV developing into cancer?"</i> [HPV persistent; 24-34 years]</p>                                                                                                                                                                                                                              |

1  
2  
3  
4  
5  
6  
7  
8  
9  
10  
11  
12  
13  
14  
15  
16  
17  
18  
19  
20  
21  
22  
23  
24  
25  
26  
27  
28  
29  
30  
31  
32  
33  
34  
35  
36  
37  
38  
39  
40  
41  
42  
43  
44  
45  
46

|                                                 |                                                                                                                                          |
|-------------------------------------------------|------------------------------------------------------------------------------------------------------------------------------------------|
| Testing for partners                            | <i>Why men don't get test for it if they can transmit it?</i> [HPV+, cyto abnorm; 24-34 years]                                           |
| <b>Information seeking and (di)satisfaction</b> |                                                                                                                                          |
| Information seeking                             | <i>"I contacted my GP for more information"</i> [HPV+, cyto norm; 24-34 years]                                                           |
| (Di)satisfaction                                | <i>"It's not explained in a very useful manner"</i> [HPV persistent; 24-34 years]                                                        |
|                                                 | <i>"I want to have more information about HPV"</i> [HPV+, cyto norm; 45-54 years]                                                        |
|                                                 | <i>"On receiving letter about results I felt I had lots of questions that I could not get answered"</i> [HPV+, cyto abnorm; 24-34 years] |

For peer review only

## Supplementary File 1 – additional information on HPV primary screening in England

Figure 1 – flow chart of HPV primary screening in the English HPV primary screening pilot sites

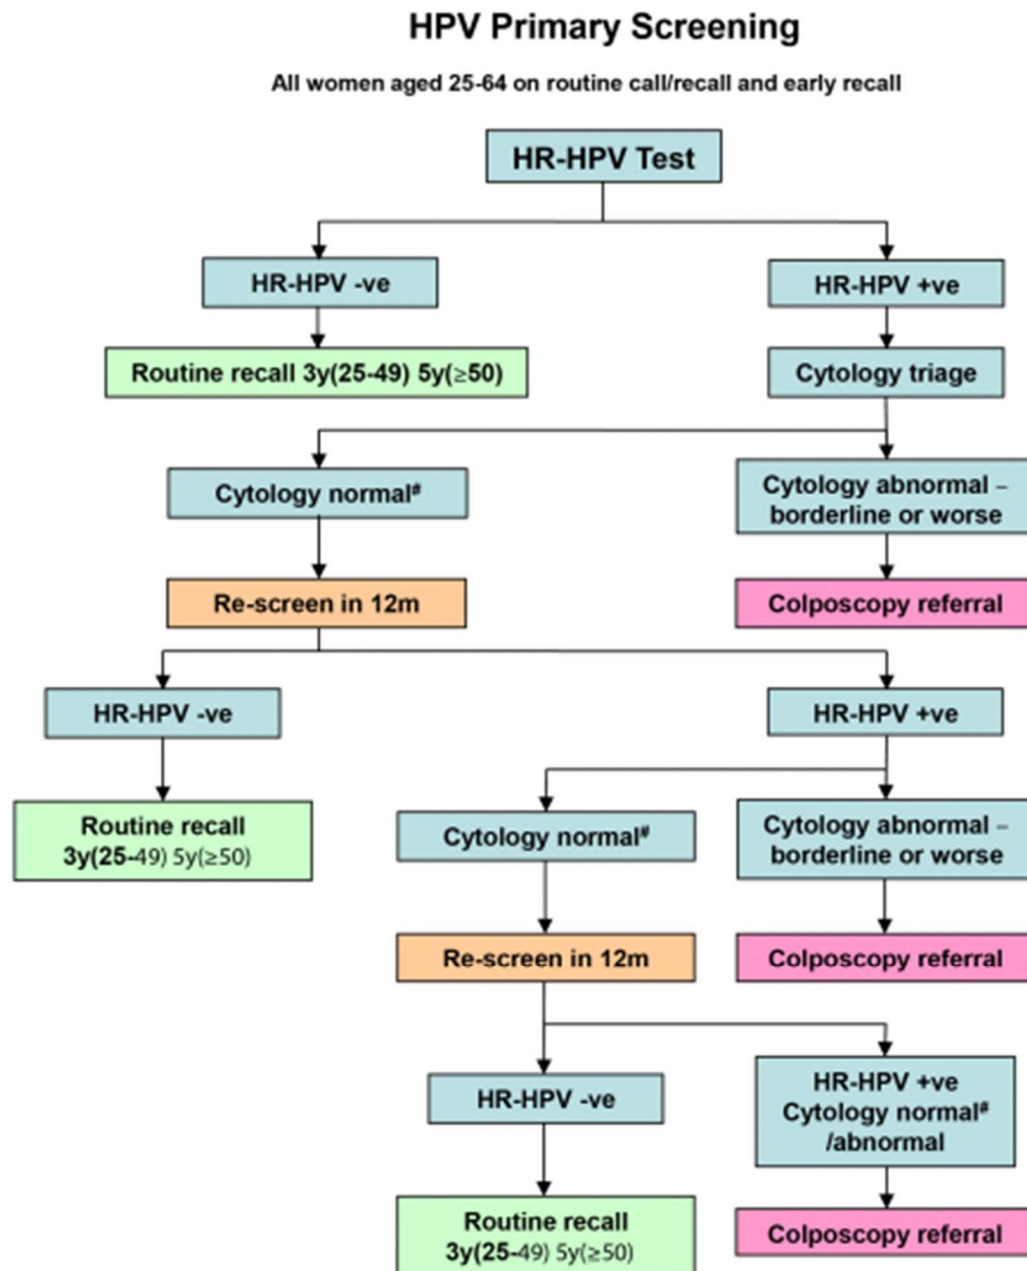

Figure from <https://phscreening.blog.gov.uk/2017/06/14/what-gps-need-to-know-about-the-introduction-of-primary-hpv-testing-in-cervical-screening/>

*Additional information*

Cervical screening in England is organised as a national call-recall programme and is free at the point of use. From the age of 24.5 years, women are invited for screening by letter every three years until age 49 years and every five years from age 49-64 years. The invitation is sent in the post and includes a leaflet with further information on cervical cancer, HPV and the screening procedure

([https://assets.publishing.service.gov.uk/government/uploads/system/uploads/attachment\\_data/file/871893/Cervical\\_screening\\_helping\\_you\\_decide.pdf](https://assets.publishing.service.gov.uk/government/uploads/system/uploads/attachment_data/file/871893/Cervical_screening_helping_you_decide.pdf)).

Screening is usually carried out by a nurse at a woman's general practice (GP) surgery but may sometimes be delivered at a sexual health or well-woman clinic. Women receive their screening results by post and if they are

referred for colposcopy, they also receive a colposcopy leaflet

(<https://www.gov.uk/government/publications/cervical-screening-colposcopy/cervical-screening-having-a-colposcopy>).

As HPV primary screening was first piloted in certain areas and then rolled out gradually across England over the course of a year, there was no public health campaign to launch HPV primary screening.

The current study took place in the context of the HPV primary screening pilot, where women were sent the following information about HPV testing with their invitation.

For peer review only



## NHS Cervical Screening Programme

# HPV primary screening

This leaflet tells you about HPV primary screening. This is a test carried out on the sample of cells we take during cervical screening.

- HPV stands for 'human papillomavirus'.
- Primary screening means that it is the first test carried out on the sample of cells from your cervical screening.

HPV primary screening makes no difference to how your screening sample is taken.

For more information about going for screening, please read our leaflet *NHS cervical screening*.

### Why have I been sent this leaflet?

You live in an area where HPV primary screening is being used in the NHS Cervical Screening Programme. This isn't happening everywhere in England yet.

### What is HPV?

The human papillomavirus (HPV) is very common. Most women get it at some point in their lives. There are many types of HPV, and most of them clear up by themselves without causing any problems. However, some types can cause cells in the cervix to change and become abnormal. These abnormal changes can, if left untreated, go on to turn into cervical cancer.

HPV is easily passed on during intimate sexual contact between partners; between men and women and between partners of the same sex. The virus has no symptoms. This means that you or a partner may have had HPV for many months or years without knowing it.

### What is HPV primary screening?

Once your cervical screening sample is sent to the laboratory, the first test carried out on it will be to look for HPV. If HPV is found, your sample will also be looked at for abnormal cells. Looking for abnormal cells is called 'cytology'. Cytology is still the test used for most cervical screening at the moment. If you don't have HPV, then it is extremely unlikely that you will have any abnormal cervical cells.

HPV primary screening should benefit women because:

- more abnormal cervical cells will be picked up
- women without HPV can be reassured that they are at extremely low risk of developing cervical cancer.

### Are all women being offered HPV primary screening?

Not yet. We are starting HPV primary screening in a few areas from 2013. This is to help us plan how this change to the screening programme can be put in place across the whole of England.

In places where HPV primary screening isn't being used yet, women will either

- not have an HPV test or
- have an HPV test only after their sample has been checked for abnormal cells (cytology).

### What screening results might I get?

There are three main types of results from HPV primary screening.

#### No HPV found (HPV negative)

If no HPV is found, then no further tests will be carried out. If you don't have HPV, then it is highly unlikely that you will have any abnormal cervical cells. Even if you did, it would be extremely unlikely that they would cause a problem. You will simply be called back for screening again in three or five years' time (depending on your age).

#### HPV found (HPV positive) but no abnormal cervical cells found

If HPV is found, the sample will also be tested for abnormal cervical cells. If none are found, your result will say you have HPV, but no abnormal cells. You will be asked to come back for screening again in 12 months' time. This is so we can check that the HPV has been cleared by your immune system. If it hasn't cleared, you may be at greater risk of developing abnormal cervical cells.

#### HPV found (HPV positive) and abnormal cervical cells found

There are several grades of abnormal cells. Some are more serious than others. You can read about this in our leaflet *What your abnormal result means*. If you have HPV and any grade of abnormal cervical cells, then you will be referred for colposcopy. Colposcopy is a closer examination of the cervix. It is carried out in much the same way as cervical screening. For

more information, you can read our leaflet *The colposcopy examination*.

It is also possible to have an 'inadequate' result. This is when the laboratory cannot get an HPV test result from your sample, or cannot see if abnormal cells are present or not. If you have an inadequate result, you may be asked to have cervical screening again in three months' time. The delay is so that there are enough cells again to get a sample from.

### Can I get treatment for HPV?

No, there isn't a treatment to get rid of the virus. For most women, their immune system will get rid of HPV – like getting rid of a common cold. But we can treat abnormal cervical cells, especially if they are found early on. Most types of cervical cancer take a long time to develop. Treating abnormal cells early on means that cervical cancer can be prevented.

### Where can I get more information?

If you would like more information about HPV primary screening, or anything else in this leaflet, you can

- talk to the nurse at your GP practice;
- visit our website at [www.cancerscreening.nhs.uk/cervical](http://www.cancerscreening.nhs.uk/cervical)

Copies of the leaflets mentioned can also be downloaded from our website.

A large print version of this leaflet is available at [www.cancerscreening.nhs.uk/cervical](http://www.cancerscreening.nhs.uk/cervical)

**Supplementary Figure 2: Overall response rate and proportion of women leaving a free-text response during the course of the study**

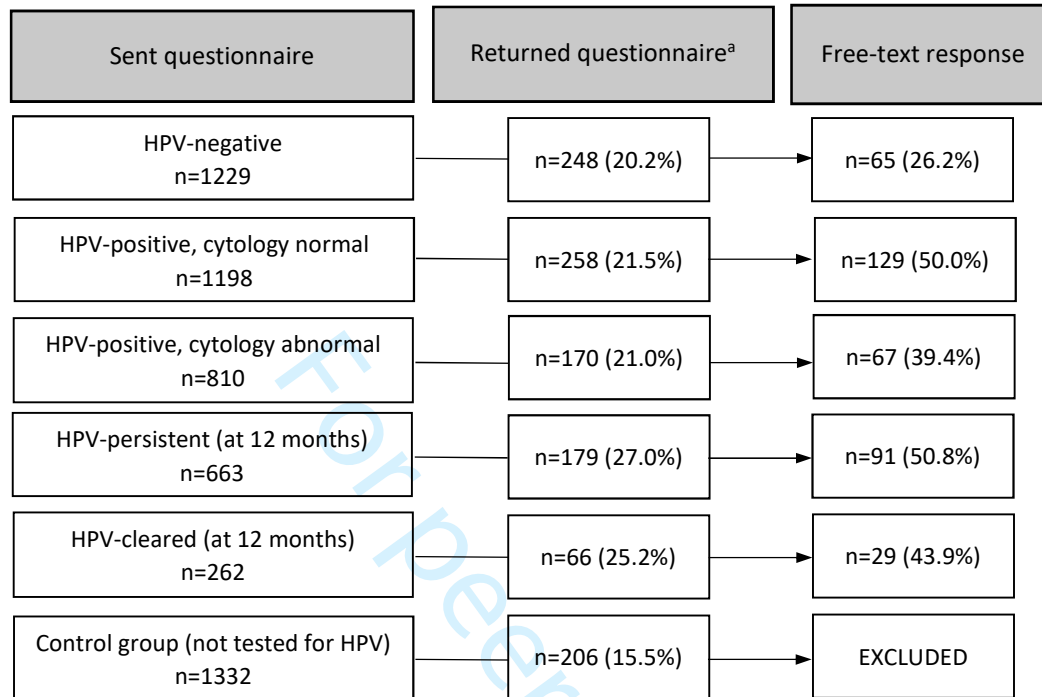

<sup>a</sup> Excluding questionnaires that were returned late or where participants were an ineligible age (n=21).

1  
2  
3 **Information needs among women taking part in primary HPV screening in England: A content**  
4 **Analysis**  
5

6 Running title: HPV information needs  
7

8 Laura A.V Marlow (corresponding author)<sup>1,2\*</sup>  
9

10 <sup>1</sup> School of Cancer & Pharmaceutical Sciences, Faculty of Life Sciences & Medicine, King's College  
11 London

12 <sup>2</sup> Department of Behavioural Science and Health, UCL  
13

14 Alice S Forster<sup>2</sup>

15 <sup>2</sup> Department of Behavioural Science and Health, UCL  
16

17 Emily McBride<sup>2</sup>

18 <sup>2</sup> Department of Behavioural Science and Health, UCL  
19

20 Lauren Rockliffe<sup>2</sup>

21 <sup>3</sup> School of Health Sciences, Faculty of Biology, Medicine and Health, University of Manchester  
22

23 <sup>2</sup> Department of Behavioural Science and Health, UCL  
24

25 Henry Kitchener

26 <sup>4</sup> Institute of Cancer Science, University of Manchester  
27

28 Jo Waller<sup>1,2</sup>  
29

30 <sup>1</sup> School of Cancer & Pharmaceutical Sciences, Faculty of Life Sciences & Medicine, King's College  
31 London

32 <sup>2</sup> Department of Behavioural Science and Health, UCL  
33

34 \* corresponding author at:

35 Address: Room GH0603334, 3<sup>rd</sup> Floor, Research Oncology, Bermondsey Wing, Guy's Hospital, Great  
36 Maze Pond, London SE1 9RT, UK

37 Email: l.marlow@kcl.ac.uk

38 Phone: 020 78484675  
39  
40  
41  
42  
43  
44  
45  
46  
47  
48  
49  
50  
51  
52  
53  
54  
55  
56  
57  
58  
59  
60

## Abstract

Objectives: Introducing primary HPV testing to cervical screening programmes means changes to the results women receive. We explored additional information needs among women undergoing HPV primary screening.

Design: Women were sent a postal questionnaire shortly after receiving their results and 6 and 12 months later. Each questionnaire asked if women had any unanswered questions about cervical screening or HPV testing. Free-text responses constituted the data. Themes were identified using Content Analysis.

Setting: NHS Cervical Screening Programme, England

Participants: 381 women who recorded one or more free-text responses.

Results: The most common theme represented women's emotional responses and attempts to understand their results. This theme was raised by 45% of women overall, but was as high as 59% in the HPV cleared group. General questions about the cause and epidemiology of HPV were raised by 38% of women and were more common among those testing HPV Positive with normal cytology (52%). Questions about the purpose and procedure for HPV testing were most common among HPV-negative women (40%, compared to 16%-25% of the other results groups). Questions about future implications of test results, were raised by 20% of women, and this theme was most common among those with persistent HPV.

Conclusions: Despite provision of information alongside screening invitations, women can still have unanswered questions following receipt of their results. Details about the epidemiology of HPV and why cervical screening procedures are changing should be included with screening invitations. Some results groups may benefit from additional tailored information with their result letter.

### Strengths and limitations of this study

- The study benefits from the inclusion of participants who had been tested for HPV as part of routine HPV primary cervical screening
- Participants represented had a range of test-HPV and cytology screening results which allowed us to compare information needs between results groups,
- Two thirds of women did not leave a free-text response.
- Questionnaires were completed at least two weeks after receiving results so women participants may already have sought additional information.
- Those with less education were less likely to leave a free-text comment.

## Keywords

cervical screening, HPV testing, information, informed choice, concerns, misunderstanding

## Introduction

Cervical screening programmes have traditionally involved looking for abnormal cytology but HPV primary screening can provide many benefits [1] and has already replaced cytology-based cervical screening in England, Australia, the Netherlands and Wales, and several other countries are expected to follow in the coming years [2,3]. HPV testing looks for presence of the HPV virus. Where HPV is found the sample is looked at for cytology. Women with HPV positive/abnormal cytology results are referred for colposcopy, women with HPV positive/normal cytology are recalled 12 months later. Based on a large pilot study in England, around 13% of women aged 25-64 years will be told they are HPV positive [4,5], compared with ~6% who currently receive an abnormal cytology result (with or without HPV). These figures are expected to decrease ~~dramatically~~ somewhat as cohorts offered HPV vaccination move into the programme [6]. Nevertheless, many women will be receiving an HPV positive result, warranting careful consideration of how these results are communicated.

Of particular concern is that some women will be learning about the link between cervical cancer and a sexually transmitted infection (STI) for the first time, which may come as a shock and could raise concerns about sexual relationships [76-98]. In a review of studies exploring understanding of HPV and information needs [109], women found it difficult to incorporate new information about HPV testing into their pre-existing understanding of cervical screening and often sought additional information after being told they were HPV-positive. The review identified uncertainty about HPV transmission, prevention, symptoms, risk factors (for HPV and cervical cancer), whether HPV could cause other cancers, treatment, fertility and the natural history of the virus. However, most of the studies included were small qualitative studies carried out before 2007, half of which used samples of women who had not actually been tested for HPV. More recently, qualitative interviews with women who were told they were HPV positive in an HPV self-sampling trial, identified some key themes: intense affect (feelings and emotions) after receiving positive results, importance of discussing results with a provider, information seeking, confusion about purpose and meaning of HPV versus Pap tests [110].

Establishing women's information needs in the context of primary screening is vital to inform patient education and communication strategies. Clear information provided at the appropriate time-point (e.g. alongside results) may help to minimise the adverse psychological responses to HPV-positive results that have been identified [121]. The aims of this study were to i) identify the information

1  
2  
3 needs of women participating in primary HPV screening and ii) to explore how these might vary  
4 according to women's HPV and cytology results. This study is part of a broader psychological  
5 evaluation of HPV primary testing in England [132].  
6  
7

## 8 **Methods**

### 9 *Participants*

10  
11 Participants were women aged 24-65 years who attended for cervical screening in England in one of  
12 five sites piloting HPV primary testing (between 2016 and 2017). Women testing HPV negative were  
13 invited for routine recall, whereas those testing positive had reflexive cytology and were managed  
14 accordingly (see Supplementary file 1 for a flow diagram and additional contextual information  
15 about cervical screening in England). Recruitment was stratified to ensure data were collected from  
16 women receiving different screening results (see Supplementary Figure 21): i) negative for HPV, ii)  
17 HPV-positive with normal cytology and iii) HPV-positive with abnormal cytology.  
18  
19

20  
21 We also recruited two groups of women who had initially tested positive for HPV with normal  
22 cytology, and who had re-attended at 12-month follow-up and either iv) had persistent HPV i.e. they  
23 were still HPV-positive with normal cytology or v) had cleared the infection i.e. they now tested HPV  
24 negative. A group of women undergoing conventional cytology screening were also recruited but we  
25 have excluded their data from the present analyses.  
26  
27

### 28 *Procedure*

29  
30 The data reported here were collected from cross-sectional surveys sent to women at three time  
31 points: shortly after receiving their results (baseline), 6-months, and 12-months. The full protocol is  
32 available elsewhere [132], but in brief women were contacted by post within two weeks of receiving  
33 their screening result letter and invited to complete and return a consent form and questionnaire.  
34 Women who returned the questionnaire were also sent questionnaires 6 and 12 months later. The  
35 primary outcome measures assessed in the questionnaire were anxiety and general distress [124].  
36 Health Research Authority (HRA) approval was granted on 26/09/2016 (Research Ethics Committee  
37 reference: 16/LO/0902 and Confidentiality Advisory Group reference: 16/CAG/0047).  
38  
39

### 40 *Patient and Public Involvement*

41  
42 We did not use any PNeither patients or the public involvement were involved in the design,  
43 conduct, analysis or reporting interpretation of this study.  
44  
45

### 46 *Measures*

47  
48 At each of the three time-points, women were asked "Do you have any unanswered questions about  
49 cervical screening or HPV testing?" and space for an open response was provided. Free-text  
50  
51  
52  
53  
54  
55  
56  
57  
58  
59  
60

1  
2  
3 responses to this question constituted the primary data for analyses. At the end of the baseline  
4 questionnaire there was also a space provided for “any other comments”. Free-text responses  
5 recorded here were also included where they were relevant to the aims of this analysis (irrelevant  
6 comments were excluded, for example comments about practical aspects of the survey study).  
7  
8 Socio-demographic information including age, marital status, education and ethnicity were also  
9 collected. Information on women’s screening results was collected directly from the screening  
10 laboratories.  
11  
12  
13  
14

### 15 *Analysis*

16 Content analysis was used to explore women’s free-text responses. Responses from all three time  
17 points were analysed together. Content analysis can be defined as “subjective interpretation of the  
18 content of text data through the systematic classification process of coding and identifying themes”  
19 [143]. Responses were typed into an excel spreadsheet and two authors (LR and EM) immersed  
20 themselves in the baseline data. An initial coding frame was developed using an inductive,  
21 conventional content analysis approach (i.e. avoiding preconceived categories) [154]. Three senior  
22 members of the research team then coded the data for 20% of the baseline participants (n=60),  
23 before refining the coding frame. All responses (from each time point) were then independently  
24 double coded. Any discrepancies were discussed. Multiple codes were allocated to individual  
25 responses when appropriate. We used 2-by-5 chi-square tests to explore differences in the  
26 proportion of women citing each major theme by result group. Sub-themes are reported  
27 descriptively.  
28  
29  
30  
31  
32  
33  
34  
35  
36

### 37 **Results**

38 Overall 921 women who had undergone HPV primary screening returned their baseline  
39 questionnaire (see Figure 21). A total of 507 free-text responses were recorded (baseline=329/921, 6  
40 months=110/762 and 12 months =68/537). Women testing HPV-positive with normal cytology and  
41 those with persistent HPV were most likely to leave a free-text response (50%); HPV-negative  
42 women were least likely (26%) to do so. Free-text responses were also more common among  
43 women in the youngest age group and those with a degree qualification (see Table 1 for sample  
44 characteristics). We have described each theme below with the prevalence of themes reported in  
45 Table 2 (overall and by results group). Illustrative examples of women’s comments are presented in  
46 Table 3.  
47  
48  
49  
50  
51  
52  
53  
54

### 55 *Reaction to and understanding of results*

56 Across all results groups (except HPV-negative), the most common theme was ‘reaction to and  
57 understanding of results’. This theme was most frequently present in comments made by HPV  
58  
59  
60

1  
2  
3 positive women (with normal or abnormal cytology, 51% and 54% respectively) and by women who  
4 had cleared HPV at 12-months (59%). Women expressed a wide range of emotional responses to  
5 their results including shock, worry and relief. Comments included questions about the exact  
6 meaning of their result, including clarification about which HPV type they had. Implications for  
7 sexual relationships were raised by a number of women, including requests for clarification of what  
8 their result meant for future sexual relationships, concern about re-infection within a relationship  
9 and the possible consequences of infection for their partner. A lack of confidence in HPV results and  
10 requests for cytology were recorded by 5% of women (12% of women who were HPV negative and  
11 21% had cleared HPV). Having previously experienced an abnormal result or approaching the end of  
12 cervical screening eligibility were reasons that women gave for concern about not having a cytology  
13 test.  
14

#### 15 *Questions about HPV and cervical cancer*

16 Over a third of women who left a comment recorded a question about HPV (38%) and this was more  
17 common among women who were HPV-positive with normal cytology (52%) or who had persistent  
18 HPV (41%). Women asked about various aspects of HPV epidemiology including questions about the  
19 timeline of infection, latency and clearance. Women's questions about HPV also included requests  
20 for clarification about the cause of their HPV, frequently including references to their long-term or  
21 sexual relationships. The potential for preventing future HPV infections and treating current ones  
22 was also raised. Some women expressed a more general lack of understanding about HPV, saying  
23 they had never heard of it or did not know what it was.  
24

25 A smaller number of women provided comments about cervical cancer (14% across all results  
26 groups). A range of general questions were raised about the risk of developing cervical cancer. Some  
27 women also asked about other specific causal risk factors for cervical cancer (e.g. polycystic ovary  
28 syndrome, contraceptive implants, previous cancer diagnosis or treatment).  
29

#### 30 *Purpose and procedure for HPV testing*

31 'Purpose and procedure for HPV testing' was the most common theme for HPV-negative women  
32 (40%) but was also raised by HPV-positive women (16-24%) and women who had cleared HPV (24%).  
33 Questions about the purpose of HPV testing were predominantly to clarify how HPV testing fit with  
34 their existing knowledge of cervical screening, but some women mentioned being unaware they had  
35 been tested for HPV until they received their results. Some HPV-negative women wanted to clarify  
36 whether their sample had been cytology tested or why cytology was not also performed.  
37

38 Women also made comments about the timing of tests, particularly in relation to repeat HPV  
39 testing. They wanted to be reassured that the recommended intervals were 'soon enough' or  
40



1  
2  
3 'adequate'. Several women also commented on the delivery of their results, for example saying that  
4 the results had not been clear from the letter they received and that further discussion with their GP  
5 had been needed.  
6  
7

#### 8 *Future implications of test results*

9  
10 The theme 'Future implications of the results' was identified in 19% of the comments and was most  
11 commonly recorded for women with persistent HPV (30%). These comments related specifically to  
12 clinical management, with requests for clarification about what would happen next for them.  
13  
14 Implications for fertility, for their partners being tested and advice on clearing HPV was mentioned  
15 by a few women.  
16  
17  
18  
19  
20  
21

#### 22 *Information seeking and (di)satisfaction*

23 Some women described their experiences of seeking additional information about HPV. This  
24 predominantly included experiences of searching online or contacting their GP surgery to discuss  
25 their result further (with a GP or nurse) and was recorded for 22% of those leaving a comment. A  
26 number of women indicated satisfaction, or more commonly lack of satisfaction, with the  
27 information they had received.  
28  
29  
30  
31

#### 32 **Discussion**

33  
34 This study found women undergoing primary HPV testing for cervical screening can have additional  
35 information needs after receiving their results. Requests for more information about the  
36 epidemiology and cause of HPV were common across all results groups, so this seems to be  
37 important information to communicate to women taking part in screening. Other questions were  
38 more common among women receiving particular results; for example women receiving an HPV  
39 positive result (with normal cytology) often had questions about the meaning of this result and  
40 wanted advice about the implications for sexual relationships. Women with abnormal cytology  
41 seemed to have fewer questions about HPV and the meaning of their result. This may in part be  
42 because they had been referred for colposcopy and even if they had not yet attended and had the  
43 opportunity to ask questions, they would have received an additional information leaflet with their  
44 results letter. ~~but~~ They did, however, expressed more worry and concern. ~~This~~ These differences  
45 suggests there may be merit in including results-tailored information alongside the delivery of  
46 results. However, the wide range of themes identified and the personalised nature of many  
47 questions means signposting to additional information will also be important.  
48  
49  
50  
51  
52  
53  
54  
55  
56  
57  
58  
59  
60

1  
2  
3 Some of our themes relating to women's understanding of HPV and cervical cancer were similar to  
4 other studies [98,109], supporting the need to provide women with information about the cause and  
5 epidemiology of HPV. Women's desire to develop a coherent model of what HPV is, the timeline of  
6 infection and its cause and consequences is supported by theoretical models of illness  
7 representation which suggest that these aspects are important for understanding HPV and cervical  
8 cancer and consequently for coping with being given an HPV-positive result [165,176].  
9

10  
11 Previous studies have suggested that women are often shocked to learn about the sexually  
12 transmitted nature of HPV [76,87]. Implications for sexual relationships was not the most common  
13 theme identified and while this question was raised by some women (particularly those who test  
14 HPV-positive with normal cytology), it is reassuring that this was not more widespread in women's  
15 responses. Some themes such as the impact of HPV on fertility or questions about the impact for  
16 male partners, were raised by very few women suggesting these are unlikely to be major areas of  
17 concern. [Studies exploring the psychological impact of testing HPV positive in the context of  
18 organised screening show no differences in distress across result groups, but anxiety can be slightly  
19 higher in HPV positive women, at least in the short term \[e.g. 12, 18\].](#)  
20  
21

22  
23 The main strength of this study is that we included women who had been tested for HPV as part of  
24 routine cervical screening, meaning we were able to compare responses across results groups.  
25 However, there are some limitations. The overall response rate for the questionnaire was low and of  
26 those responding, less than half recorded a free-text response. We cannot be sure if women who  
27 chose not to leave a free-text response had no information needs or just did not state them. In  
28 addition, since the questionnaires were completed at least two weeks after receiving results, women  
29 may already have sought answers to any questions they initially had. It is therefore likely that our  
30 study underestimates the number of questions women have upon receiving their result. Women  
31 from lower socio-economic backgrounds were less likely to return the questionnaire [121] and those  
32 with less education were less likely to leave a free-text comment. It is therefore possible that the  
33 results under-represent the concerns of women from lower socio-economic backgrounds. [Future  
34 research on HPV information needs should focus on these harder to reach groups.](#)  
35  
36

37  
38 A number of implications arise from this study. Firstly, it is important that women are made aware of  
39 HPV before being tested. For some women, including information about HPV in invitation letters will  
40 not be sufficient so sample-takers have an important role in ensuring women know they are having  
41 an HPV test. In some instances, this may be simply by drawing their attention to the information  
42 leaflet that they receive with their screening invitation, but for some women this will lead to  
43 additional questions which sample-takers should be prepared to answer.  
44  
45  
46  
47  
48  
49  
50  
51  
52  
53  
54  
55  
56  
57  
58  
59  
60

1  
2  
3 Secondly, information provided to women alongside their results should ideally be tailored to the  
4 result being communicated. Many of the women who were HPV-positive or had recently cleared  
5 HPV had questions about the meaning of their result and some described contacting their GP  
6 surgery to discuss this. This is consistent with findings in the US, where women receiving HPV  
7 positive results felt a sense of urgency to discuss it with their Health care provider and felt reassured  
8 after this had happened [119]. It is important that staff in primary care are well equipped to answer  
9 women's questions or to direct them to the best source of information. This may involve answering  
10 questions about HPV themselves or directing women to online information materials (e.g. the NHS  
11 screening website). In particular, the information needs recorded by women were frequently  
12 interlinked with their personal information and medical history, reflecting attempts to make sense of  
13 their results. There are likely to be women who want to discuss their specific results and this might  
14 also include how their risk relates to their past screening history or other health conditions. For  
15 these women, knowing who they can contact (e.g. a specific helpline, a cancer charity helpline, their  
16 GP) will be important.

17  
18 Finally, for some women there was confusion about why changes were being made to the screening  
19 programme and concern about the fact that their sample had not been checked for abnormal cells.  
20 It is important to explain why screening is changing and to reassure women that HPV testing is  
21 better than cytology, with the changes being made to improve the screening programme. It might  
22 also be useful to clarify specifically that this is safe even for women who are at the end of screening  
23 (mentioned by some women in their 60s) or those who have previously had abnormal cytology  
24 results. The recent public backlash following changes to the cervical screening programme in  
25 Australia has highlighted the importance of explaining the rationale behind and safety of changes  
26 being made in public health [197].

27  
28 Women taking part in HPV-based cervical screening continue to have additional information needs.  
29 Information about the epidemiology of HPV, why the cervical screening procedure is changing and  
30 the meaning and implications of different results, should be provided in materials accompanying  
31 results. Tailored information and signposting to additional materials and resources would also help  
32 to ensure women can find the information they need

### Contributorship Statement

33  
34 JW, LM, AF and HK conceived the study. JW, LM, EM and AF developed the measures. EM, JW and LR  
35 managed the project. All authors contributed to the analyses. LM drafted the paper. All authors  
36 contributed to the final version of the manuscript. We would like to thank all the laboratory staff  
37  
38  
39  
40  
41  
42  
43  
44  
45  
46  
47  
48  
49  
50  
51  
52  
53  
54  
55  
56  
57  
58  
59  
60

1  
2  
3 who made recruiting for the psychological evaluation possible, as well as Kirsty Bennett and Fatima  
4 Osmani who contributed to recruitment and data entry. We also thank Julieta Patnick for her helpful  
5 comments.  
6  
7

### 8 **Competing interests**

9  
10 The authors declare no conflict of interest.  
11

### 12 **Funding**

13  
14 Our study was funded by Public Health England (PHE). No grant number was given. PHE funded Emily  
15 McBride from 03/01/2016 until 30/09/2017. EM was funded by the National Institute for Health  
16 Research (NIHR) from 01/10/2017 [grant number DRF-2017-10-105]; the views expressed in this  
17 article are not necessarily those of the NHS, the NIHR or the Department of Health and Social Care.  
18 JW, LM and AF are funded by Cancer Research UK (grant numbers C7492/A17219 and  
19 C49896/A17429).  
20  
21  
22  
23

### 24 **Data sharing statement**

25  
26 Data is available from the corresponding author upon reasonable request.  
27  
28  
29

### 30 **References**

- 31  
32 [1] Schiffman M, Wentzensen N, Wacholder S, Kinney W, Gage JC, Castle PE. Human  
33 papillomavirus testing in the prevention of cervical cancer. *J Natl Cancer Inst* 2011;103:368-83.  
34  
35 [2] Wentzensen N, Arbyn M, Berkhof J, Bower M, Canfell K, Einstein M et al. Eurogin 2016  
36 Roadmap: how HPV knowledge is changing screening practice. *Int J Cancer* 2017;140:2192-200.  
37  
38 [3] Cuschieri K, Ronco G, Lorincz A, Smith L, Ogilvie G, Mirabello L et al. Eurogin roadmap 2017:  
39 Triage strategies for the management of HPV-positive women in cervical screening programs. *Int J*  
40 *Cancer* 2018;143:735-45.  
41  
42 [4] Kitchener HC, Almonte M, Gilham C, Dowie R, Stoykova B, Sargent A et al. ARTISTIC: a  
43 randomised trial of human papillomavirus (HPV) testing in primary cervical screening. *Health Technol*  
44 *Assess* 2009;13:1-150, iii-iv.  
45  
46 [5] Rebolj M, Rimmer J, Denton K, Tidy J, Mathews C, Ellis K et al. Primary cervical screening  
47 with highrisk human papillomavirus testing: observational study. *BMJ* 2019;364:l240.  
48  
49 [6] Brotherton JM, Hawkes D, Sultana F, Malloy MJ, Machalek DA, Smith MA et al. Age-specific  
50 HPV prevalence among 116,052 women in Australia's renewed cervical screening program: A new  
51 tool for monitoring vaccine impact. *Vaccine* 2019;37(3):412-416.  
52  
53 [7] Waller J, McCaffery K, Nazroo J, Wardle J. Making sense of information about HPV in cervical  
54 screening: a qualitative study. *Br J Cancer* 2005;92:265-70.  
55  
56  
57  
58  
59  
60

- 1  
2  
3 [8] McCaffery K, Forrest S, Waller J, Desai M, Szarewski A, Wardle J. Attitudes towards HPV  
4 testing: a qualitative study of beliefs among Indian, Pakistani, African-Caribbean and white British  
5 women in the UK. *Br J Cancer* 2003;88:42-6.  
6  
7  
8 [9] Patel H, Moss EL, Sherman SM. HPV primary cervical screening in England: Women's  
9 awareness and attitudes. *Psychooncology* 2018;27:1559-64.  
10  
11 [10] Hendry M, Pasterfield D, Lewis R, Clements A, Damery S, Neal RD et al. Are women ready for  
12 the new cervical screening protocol in England? A systematic review and qualitative synthesis of  
13 views about human papillomavirus testing. *Br J Cancer* 2012;107:243-54.  
14  
15 [11] Tiro JA, Betts AC, Kimbel K, et al. (2019) Understanding Patients' Perspectives and  
16 Information Needs Following a Positive Home Human Papillomavirus Self-Sampling Kit Result. *J*  
17 *Womens Health (Larchmt) (United States)*, 28(3) p384-392  
18  
19 [12] McBride E, Marlow LAV, Forster AS, Ridout D, Kitchener H, Patnick J et al. Anxiety and  
20 distress following receipt of results from routine HPV primary testing in cervical screening: The  
21 psychological impact of primary screening (PIPS) study. *Int J Cancer* 2020;146(8):2113-2121.  
22  
23 [13] McBride E, Marlow L, Forster AS, Moss S, Myles J, Kitchener H et al. Psychological Impact of  
24 Primary Screening (PIPS) for HPV: a protocol for a cross-sectional evaluation within the NHS cervical  
25 screening programme. *BMJ Open* 2016;6:e014356.  
26  
27 [14] Hsieh HF, Shannon SE. Three approaches to qualitative content analysis. *Qual Health Res*  
28 2005;15:1277-88.  
29  
30 [15] Kondracki NL, Wellman NS, Amundson DR. Content analysis: review of methods and their  
31 applications in nutrition education. *J Nutr Educ Behav* 2002;34:224-30.  
32  
33 [16] Leventhal H, Meyer D, Nerenz D. The common sense representation of illness danger. In:  
34 Rachman S, ed. *Contributions to Medical Psychology*. New York: Pergamon Press 1980:7-30.  
35  
36 [17] Marlow LA, Wardle J, Grant N, Waller J. Human papillomavirus (HPV) information needs: a  
37 theoreticl framework. *J Fam Plann Reprod Health Care* 2009;35:29-33.  
38  
39 [18] Andreassen T, Hansen BT, Engesaeter B, Hashim D, Støer NC, Tropé A et al. Psychological  
40 effect of cervical cancer screening when changing primary screening method from cytology to high-  
41 risk human papilloma virus testing. *Int J Cancer* 2019;145(1):29-39.  
42  
43 [19] Smith M, Hammond I, Saville M. Lessons from the renewal of the National Cervical Screening  
44 Program in Australia. *Public Health Res Pract* 2019;29:2921914  
45  
46  
47  
48  
49  
50  
51  
52  
53  
54  
55  
56  
57  
58  
59  
60

**Table 1: Sample characteristics of women participating in HPV primary testing who did and did not record a free-text response during the course of the study (n=921)**

|                                 | Free-text response recorded at any time |       | No free-text response recorded |       | $\chi^2$ (df), p-value    |
|---------------------------------|-----------------------------------------|-------|--------------------------------|-------|---------------------------|
|                                 | N                                       | Row % | n                              | Row % |                           |
| Overall                         | 381                                     | 41.4  | 540                            | 58.6  |                           |
| Result group                    |                                         |       |                                |       |                           |
| HPV negative                    | 65                                      | 26.2  | 183                            | 73.8  | $\chi^2(4)=38.49, p<.001$ |
| HPV positive, cytology normal   | 126                                     | 50.0  | 129                            | 50.0  |                           |
| HPV positive, cytology abnormal | 67                                      | 39.4  | 103                            | 60.6  |                           |
| Persistent HPV                  | 91                                      | 50.8  | 88                             | 49.2  |                           |
| Cleared HPV                     | 29                                      | 43.9  | 37                             | 56.1  |                           |
| Age                             |                                         |       |                                |       |                           |
| 24-34                           | 171                                     | 46.7  | 195                            | 53.3  | $\chi^2(3)=10.63, p=.014$ |
| 35-44                           | 66                                      | 32.7  | 136                            | 67.3  |                           |
| 45-54                           | 80                                      | 41.0  | 115                            | 59.0  |                           |
| 55-65                           | 64                                      | 41.0  | 92                             | 59.0  |                           |
| Marital status*                 |                                         |       |                                |       |                           |
| Current partner                 | 281                                     | 40.7  | 410                            | 59.3  | $\chi^2(1)=.79, p=.375$   |
| No partner                      | 95                                      | 44.4  | 119                            | 55.6  |                           |
| Education**                     |                                         |       |                                |       |                           |
| Degree or higher                | 189                                     | 48.8  | 198                            | 51.2  | $\chi^2(2)=14.62, p=.001$ |
| Qualifications below degree     | 177                                     | 36.0  | 314                            | 64.0  |                           |
| No formal qualifications        | 7                                       | 38.9  | 11                             | 61.1  |                           |
| Ethnicity                       |                                         |       |                                |       |                           |
| White (British or other)        | 356                                     | 42.7  | 527                            | 57.3  | $\chi^2(1)=4.77, p=.029$  |
| Other ethnicity***              | 20                                      | 28.6  | 50                             | 71.4  |                           |

\*Marital status: current partner (married, civil partnership, living with partner, in a relationship) and no partner (single, divorced, widowed). \*\*No formal qualifications included those with no qualifications and those who were still studying with no previous qualifications. \*\*\*Other ethnicity includes: Asian/Asian British, Black/African/Caribbean/Black British, Mixed/Multiple ethnic groups, other ethnic group.

NOTE: Where n does not add up to n=921, this is due to missing data

**Table 2: Number of women mentioning each major and sub-theme overall and by test result group**

|                                                 | Overall<br>(n=381) | HPV<br>negative<br>(n=65) | HPV<br>positive,<br>cytology<br>normal<br>(n=129) | HPV<br>positive,<br>cytology<br>abnormal<br>(n=67) | Persistent<br>HPV<br>(n=91) | Cleared<br>HPV<br>(n=29) | $\chi^2$ (df),<br>p-value   |
|-------------------------------------------------|--------------------|---------------------------|---------------------------------------------------|----------------------------------------------------|-----------------------------|--------------------------|-----------------------------|
|                                                 | n (%)              | n (%)                     | n (%)                                             | n (%)                                              | n (%)                       | n (%)                    |                             |
| <b>Reaction to and understanding of results</b> | <b>170 (45)</b>    | <b>11 (17)</b>            | <b>69 (54)</b>                                    | <b>34 (51)</b>                                     | <b>39 (43)</b>              | <b>17 (59)</b>           | $\chi^2(4)=27.72,$<br>.001  |
| Emotional response                              | 85 (22)            | 5 (8)                     | 28 (22)                                           | 24 (36)                                            | 18 (20)                     | 10 (35)                  |                             |
| Meaning of results                              | 72 (19)            | 1 (2)                     | 35 (27)                                           | 11 (16)                                            | 21 (23)                     | 4 (14)                   |                             |
| Impact on sexual relationships                  | 41 (11)            | 0                         | 25 (19)                                           | 4 (6)                                              | 11 (12)                     | 1 (3)                    |                             |
| Confidence in results                           | 20 (5)             | 8 (12)                    | 4 (3)                                             | 1 (2)                                              | 1 (1)                       | 6 (21)                   |                             |
| <b>Questions about HPV</b>                      | <b>143 (38)</b>    | <b>8 (12)</b>             | <b>67 (52)</b>                                    | <b>20 (30)</b>                                     | <b>37 (41)</b>              | <b>11 (38)</b>           | $\chi^2(4)=31.13,$<br><.001 |
| General lack of understanding                   | 24 (7)             | 2 (3)                     | 15 (12)                                           | 6 (9)                                              | 4 (4)                       | 0                        |                             |
| Epidemiology of HPV                             | 63 (17)            | 2 (3)                     | 30 (23)                                           | 5 (8)                                              | 20 (22)                     | 6 (21)                   |                             |
| Cause of HPV                                    | 32 (8)             | 1 (2)                     | 20 (16)                                           | 3 (5)                                              | 6 (7)                       | 2 (7)                    |                             |
| Prevention/Treatment of HPV                     | 28 (7)             | 0                         | 11 (9)                                            | 7 (10)                                             | 9 (10)                      | 1 (3)                    |                             |
| HPV vaccination                                 | 39 (10)            | 3 (5)                     | 20 (16)                                           | 2 (3)                                              | 11 (12)                     | 3 (10)                   |                             |
| <b>Questions about cervical cancer</b>          | <b>52 (14)</b>     | <b>5 (8)</b>              | <b>24 (19)</b>                                    | <b>7 (10)</b>                                      | <b>14 (15)</b>              | <b>2 (7)</b>             | $\chi^2(4)=6.58,$<br>.160   |
| Risk of cervical cancer                         | 45 (12)            | 3 (3)                     | 20 (16)                                           | 7 (10)                                             | 14 (15)                     | 2 (7)                    |                             |
| Other cervical cancer risk factors              | 14 (4)             | 3 (5)                     | 7 (5)                                             | 1 (2)                                              | 2 (2)                       | 1 (3)                    |                             |
| <b>Purpose and procedure for HPV testing</b>    | <b>85 (22)</b>     | <b>26 (40)</b>            | <b>20 (16)</b>                                    | <b>16 (24)</b>                                     | <b>16 (18)</b>              | <b>7 (24)</b>            | $\chi^2(4)=16.51,$<br>.002  |
| Purpose                                         | 22 (6)             | 11 (17)                   | 5 (4)                                             | 4 (6)                                              | 2 (2)                       | 0                        |                             |
| Procedure                                       | 18 (5)             | 10 (15)                   | 3 (2)                                             | 1 (2)                                              | 0                           | 4 (14)                   |                             |
| Timing                                          | 36 (9)             | 4 (6)                     | 12 (9)                                            | 5 (8)                                              | 11 (12)                     | 4 (14)                   |                             |
| Delivery of results                             | 15 (4)             | 4 (6)                     | 1 (1)                                             | 7 (10)                                             | 3 (3)                       | 0                        |                             |
| <b>Future implications of test results</b>      | <b>73 (19)</b>     | <b>1 (2)</b>              | <b>30 (23)</b>                                    | <b>10 (15)</b>                                     | <b>27 (30)</b>              | <b>5 (17)</b>            | $\chi^2(4)=21.76,$<br><.001 |
| Clinical management                             | 39 (10)            | 1(2)                      | 14(11)                                            | 4 (6)                                              | 19 (21)                     | 1 (4)                    |                             |
| Fertility/sexual health                         | 13 (3)             | 0                         | 5 (4)                                             | 1 (3)                                              | 3 (3)                       | 3 (10)                   |                             |
| Advice on clearing HPV                          | 18 (5)             | 0                         | 10 (8)                                            | 2 (3)                                              | 5 (6)                       | 1 (3)                    |                             |
| Testing for partners                            | 7 (2)              | 0                         | 4 (3)                                             | 2 (3)                                              | 1 (1)                       | 0                        |                             |
| <b>Information seeking/(di)satisfaction</b>     | <b>85 (22)</b>     | <b>8 (12)</b>             | <b>37 (29)</b>                                    | <b>14 (21)</b>                                     | <b>22 (24)</b>              | <b>4 (14)</b>            | $\chi^2(4)=8.25,$<br>.083   |
| Information seeking                             | 30 (8)             | 3 (5)                     | 15 (12)                                           | 7 (10)                                             | 5 (6)                       | 0                        |                             |
| (Di)satisfaction                                | 73 (19)            | 6 (9)                     | 31 (24)                                           | 12 (18)                                            | 20 (22)                     | 4 (14)                   |                             |

**Table 3: Examples of each quote**

| Reaction to and understanding of results |                                                                                                                                                                                                                                                                                                                                                                                                                                                                                                                        |
|------------------------------------------|------------------------------------------------------------------------------------------------------------------------------------------------------------------------------------------------------------------------------------------------------------------------------------------------------------------------------------------------------------------------------------------------------------------------------------------------------------------------------------------------------------------------|
| Emotional response                       | <p><i>"I am very worried in case I end up with cervical cancer"</i> [HPV+, cyto norm; 55-65 years]</p> <p><i>"I feel quite distressed about the results and the letter ... has caused me stress and anxiety"</i> [HPV+, cyto abnorm; 24-34 years]</p> <p><i>"I was advised I do not have HPV, I have had this persistently for years, I am so relieved"</i> [HPV cleared; 24-34 years]</p>                                                                                                                             |
| Confidence in results                    | <p><i>"I have a family history of abnormal cells being found, but I was not tested for anything other than HPV. I would like to have a further test to confirm no abnormal cells"</i> [HPV-; 35-44 years]</p> <p><i>"Because I have previously had abnormal cells... I was not reassured by my HPV-negative result"</i> [HPV-; 45-54 years]</p> <p><i>"I am uneasy about the fact that cells have not been checked for abnormality, especially as no further tests will be offered to me"</i> [HPV -; 55-65 years]</p> |
| Meaning of results                       | <p><i>"I was cleared of HPV last year, why has it come back?"</i> [HPV+, cyto norm; 45-54 years]</p> <p><i>"I have had two smears now both HPV-positive. How long can a person be HPV-positive for HPV?"</i> [HPV persistent; 45-54 years]</p> <p><i>"My previous test was positive and this one was negative. Does this mean it is still present but not active?"</i> [HPV cleared; 24-34 years] <i>"I caught genital warts at 23 - is this somehow different?"</i> [HPV+, cyto norm; 24-34 years]</p>                |
| Impact on sexual relationships           | <p><i>"Not sure what this means for future sexual relationships"</i> [HPV+, cyto abnorm; 24-34 years]</p> <p><i>"Can it be perpetuated by continuously being passed from one partner to the other?"</i> [HPV+, cyto norm; 55-65 years]</p> <p><i>"Should I tell sexual partners?"</i> [HPV+, cyto norm; 24-34 years]</p> <p><i>"Initially I worried about what my husband would think"</i> [HPV persistent; 55-65 years]</p> <p><i>"I blame my partner for this"</i> [HPV+, cyto norm; 35-44 years]</p>                |
| Questions about HPV                      |                                                                                                                                                                                                                                                                                                                                                                                                                                                                                                                        |
| General lack of understanding            | <p><i>"I didn't even know I had been tested for HPV. Have never heard of it before"</i> [HPV+, cyto norm; 35-44 years]</p> <p><i>"I don't really understand what HPV is"</i> [HPV+, cyto norm; 24-34 years]</p>                                                                                                                                                                                                                                                                                                        |
| Epidemiology of HPV                      | <p><i>"How long does HPV last? What will happen if it doesn't go away?"</i> [HPV+, cyto norm; 24-34 years]</p> <p><i>"Has it gone and come back again or have I had it for 3 years?"</i> [HPV+, cyto norm; 35-44 years]</p> <p><i>"I'm still unclear as to what makes some peoples CIN1 cells disappear while others develop further"</i> [HPV+, cyto abnorm; 35-44 years]</p> <p><i>"Will it ever go away? Or get worse?"</i> [HPV persistent; 55-65 years]</p>                                                       |
| Cause of HPV                             | <p><i>"I don't understand how I have got HPV"</i> [HPV+, cyto norm; 24-34 years]</p> <p><i>"I have not been sexually active for 6 years and can't understand why I have got it with only having one long-term partner"</i> [HPV+, cyto abnorm; 35-44 years]</p>                                                                                                                                                                                                                                                        |
| Prevention/treatment for HPV             | <p><i>"Should I now always use condoms for sex?"</i> [HPV+, cyto norm; 24-34 years]</p> <p><i>"Is there something I can take to get rid of HPV?"</i> [HPV+, cyto norm; 35-44 years]</p> <p><i>"Are there really no ways to treat the HPV virus?"</i> [HPV persistent; 55-65 years]</p>                                                                                                                                                                                                                                 |



|                                              |                                                                                                                                                                                                                                                                                                                                                                                                                                              |
|----------------------------------------------|----------------------------------------------------------------------------------------------------------------------------------------------------------------------------------------------------------------------------------------------------------------------------------------------------------------------------------------------------------------------------------------------------------------------------------------------|
| HPV vaccination                              | <p><i>"I had the HPV vaccine, why didn't it work?"</i> [HPV+, cyto norm; 24-34 years]</p> <p><i>"I'd like to know if I could be offered the vaccine and whether it would work for me"</i> [HPV+, cyto norm; 35-44 years]</p> <p><i>"I have been considering having the vaccine but unsure of benefits at my age"</i> [HPV cleared; 35-44 years]</p>                                                                                          |
| <b>Questions about cervical cancer</b>       |                                                                                                                                                                                                                                                                                                                                                                                                                                              |
| Risk of cervical cancer                      | <p><i>"What are the chances of this becoming cancerous?"</i> [HPV+, cyto norm; 55-65 years]</p> <p><i>"What proportion of women who have had 2 smears detecting high risk HPV will go on to develop cervical cancer?"</i> [HPV persistent; 45-54 years]</p>                                                                                                                                                                                  |
| Other cervical cancer risk factors           | <p><i>"There is a vast history of cancer in my family. Am I more likely to get cancer?"</i> [HPV+, cyto norm; 55-65 years]</p> <p><i>"I have a contraception implant - does this affect HPV or my chances of developing cervical cancer"</i> [HPV+, cyto norm; 24-34 years]</p>                                                                                                                                                              |
| <b>Purpose and procedure for HPV testing</b> |                                                                                                                                                                                                                                                                                                                                                                                                                                              |
| Purpose                                      | <p><i>"I am not sure if HPV test covers more, less or the same as a normal smear test"</i> [HPV-; 45-54 years]</p> <p><i>"I do not know if one is more thorough and effective than the other"</i> [HPV-; 35-44 years]</p> <p><i>"Was given no information that would be a different test other than smear"</i> [HPV+, cyto norm; 45-54 years]</p>                                                                                            |
| Procedure                                    | <p><i>"Was the HPV an additional test in addition to a normal smear test?"</i> [HPV-; 45-54 years]</p> <p><i>"Why when HPV is not present they don't test the sample"</i> [HPV cleared; 24-34 years]</p>                                                                                                                                                                                                                                     |
| Timing                                       | <p><i>"Why can't I be re-tested in 6 months instead of waiting another year?"</i> [HPV+, cyto norm; 45-54 years]</p> <p><i>"Is having my next smear in 1 year soon enough? Could my cells change quickly enough to be cancerous before then?"</i> [HPV+, cyto norm; 45-54 years]</p> <p><i>"I would like to be reassured that the intervals between tests are adequate to pick up any changes to my body"</i> [HPV cleared; 35-44 years]</p> |
| Delivery of results                          | <p><i>"I haven't received a letter with my results and I don't ever recall receiving results"</i> [HPV-; 35-44 years]</p> <p><i>"I had lots of questions that I could not get answered because results come in letter form"</i> [HPV+, cyto abnorm; 24-34 years]</p>                                                                                                                                                                         |
| <b>Future implications of test results</b>   |                                                                                                                                                                                                                                                                                                                                                                                                                                              |
| Clinical management                          | <p><i>"My test was positive two times and I want to meet a specialist"</i> [HPV+, cyto norm; 45-54 years]</p> <p><i>"I had a second positive HPV and have not been invited for further testing which the nurse said I would be. I am wondering why"</i> [HPV persistent; 55-65 years]</p> <p><i>"Am I now having a colposcopy because I have had HPV for 2 years?"</i> [HPV persistent; 45-54 years]</p>                                     |
| Fertility/sexual health                      | <p><i>"I am due a second test in 1 years time, but I am hopefully aiming to be pregnant around then, is this a major problem?"</i> [HPV+, cyto norm; 24-34 years]</p> <p><i>"Will it increase my chances of miscarriage?"</i> [HPV persistent; 24-34 years]</p>                                                                                                                                                                              |
| Advice on clearing HPV                       | <p><i>"What can I do in the next 12 months to help myself?"</i> [HPV+, cyto norm; 24-34 years]</p> <p><i>"Is there anything I can do to stop HPV developing into cancer?"</i> [HPV persistent; 24-34 years]</p>                                                                                                                                                                                                                              |

1  
2  
3  
4  
5  
6  
7  
8  
9  
10  
11  
12  
13  
14  
15  
16  
17  
18  
19  
20  
21  
22  
23  
24  
25  
26  
27  
28  
29  
30  
31  
32  
33  
34  
35  
36  
37  
38  
39  
40  
41  
42  
43  
44  
45  
46

|                                                 |                                                                                                                                          |
|-------------------------------------------------|------------------------------------------------------------------------------------------------------------------------------------------|
| Testing for partners                            | <i>Why men don't get test for it if they can transmit it?</i> [HPV+, cyto abnorm; 24-34 years]                                           |
| <b>Information seeking and (di)satisfaction</b> |                                                                                                                                          |
| Information seeking                             | <i>"I contacted my GP for more information"</i> [HPV+, cyto norm; 24-34 years]                                                           |
| (Di)satisfaction                                | <i>"It's not explained in a very useful manner"</i> [HPV persistent; 24-34 years]                                                        |
|                                                 | <i>"I want to have more information about HPV"</i> [HPV+, cyto norm; 45-54 years]                                                        |
|                                                 | <i>"On receiving letter about results I felt I had lots of questions that I could not get answered"</i> [HPV+, cyto abnorm; 24-34 years] |

For peer review only
