# Supplementary material for: Information needs among women taking part in primary HPV screening in England: a content analysis
Source: PubMed Central journal article supplement (PMC7745520; doi:10.1136/bmjopen-2020-044630), 2020-12-15
Supplement: bmjopen-2020-044630supp001.pdf [file bmjopen-2020-044630supp001.pdf]

**Supplementary Figure 2: Overall response rate and proportion of women leaving a free-test response during the course of the study**

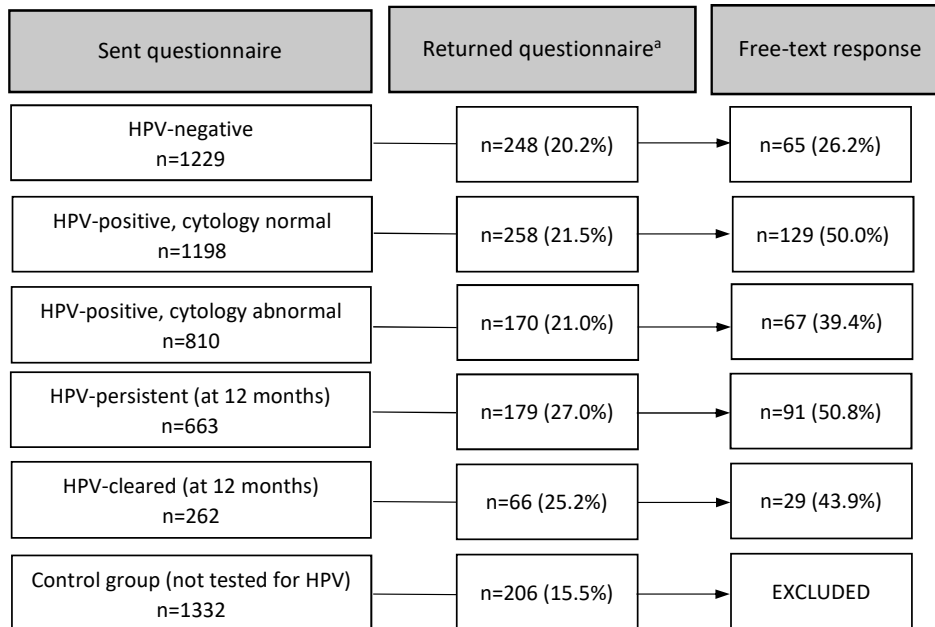

<sup>a</sup> Excluding questionnaires that were returned late or where participants were an ineligible age (n=21).
